# Supplementary material for: Dissecting the alternation landscape of mitochondrial metabolism-related genes in lung adenocarcinoma and their latent mechanisms
Source: Aging (Albany NY). 2023 Jun 15;15(12):5482–96. doi: 10.18632/aging.204803 (PMC10333067; doi:10.18632/aging.204803)
Supplement: Supplementary File 1 [file aging-15-204803-s001.xlsx]

## Sheet: Figure 1D
Supplementary File 1. The results of GSEA from Figures 1D, 2B.
ID	Description	GeneRatio	BgRatio	pvalue	p.adjust	qvalue	geneID	Count
hsa00280	Valine, leucine and isoleucine degradation	9/65	48/8157	9.59349e-11	1.08579e-08	7.02623e-09	DLD/HIBCH/ACAT1/OXCT1/ACADSB/PCCB/ALDH6A1/ALDH2/ALDH7A1	9
hsa04932	Non-alcoholic fatty liver disease	13/65	155/8157	1.77998e-10	1.08579e-08	7.02623e-09	CYC1/COX5A/UQCRC2/SDHD/NDUFS1/NDUFA6/NDUFS6/NDUFA10/NDUFB7/NDUFA3/COX7B/BID/CASP8	13
hsa05415	Diabetic cardiomyopathy	14/65	203/8157	4.45936e-10	1.81347e-08	1.17351e-08	CYC1/COX5A/UQCRC2/SDHD/NDUFS1/SLC25A4/NDUFA6/NDUFS6/NDUFA10/NDUFB7/VDAC3/NDUFA3/COX7B/GSR	14
hsa01200	Carbon metabolism	11/65	115/8157	1.27354e-09	3.75326e-08	2.42877e-08	OGDH/SDHD/MDH2/DLAT/DLD/HIBCH/ACAT1/PCCB/ALDH6A1/GLUD1/GLUD2	11
hsa05208	Chemical carcinogenesis - reactive oxygen species	14/65	223/8157	1.53822e-09	3.75326e-08	2.42877e-08	CYC1/COX5A/UQCRC2/SDHD/NDUFS1/SLC25A4/NDUFA6/NDUFS6/NDUFA10/NDUFB7/VDAC3/NDUFA3/COX7B/MGST3	14
hsa00190	Oxidative phosphorylation	11/65	134/8157	6.5469e-09	1.3312e-07	8.61434e-08	CYC1/COX5A/UQCRC2/SDHD/NDUFS1/NDUFA6/NDUFS6/NDUFA10/NDUFB7/NDUFA3/COX7B	11
hsa05012	Parkinson disease	14/65	266/8157	1.50368e-08	2.6207e-07	1.69588e-07	CYC1/COX5A/UQCRC2/SDHD/NDUFS1/SLC25A4/NDUFA6/NDUFS6/NDUFA10/NDUFB7/VDAC3/NDUFA3/COX7B/MAOA	14
hsa00620	Pyruvate metabolism	7/65	47/8157	7.17178e-08	1.0937e-06	7.07742e-07	MDH2/DLAT/DLD/ACAT1/ALDH2/GRHPR/ALDH7A1	7
hsa05016	Huntington disease	14/65	306/8157	8.80448e-08	1.1935e-06	7.72323e-07	CYC1/COX5A/UQCRC2/SDHD/NDUFS1/SLC25A4/NDUFA6/NDUFS6/NDUFA10/NDUFB7/VDAC3/NDUFA3/COX7B/CASP8	14
hsa05020	Prion disease	13/65	273/8157	1.71826e-07	2.09627e-06	1.35652e-06	CYC1/COX5A/UQCRC2/SDHD/NDUFS1/SLC25A4/NDUFA6/NDUFS6/NDUFA10/NDUFB7/VDAC3/NDUFA3/COX7B	13
hsa04714	Thermogenesis	12/65	232/8157	2.23874e-07	2.29205e-06	1.48321e-06	CYC1/COX5A/UQCRC2/SDHD/NDUFS1/NDUFA6/NDUFS6/NDUFA10/NDUFB7/NDUFA3/COX7B/COA1	12
hsa05010	Alzheimer disease	15/65	384/8157	2.25448e-07	2.29205e-06	1.48321e-06	CYC1/COX5A/UQCRC2/SDHD/NDUFS1/SLC25A4/NDUFA6/NDUFS6/NDUFA10/NDUFB7/VDAC3/NDUFA3/COX7B/BID/CASP8	15
hsa00020	Citrate cycle (TCA cycle)	5/65	30/8157	3.35838e-06	2.79556e-05	1.80903e-05	OGDH/SDHD/MDH2/DLAT/DLD	5
hsa00630	Glyoxylate and dicarboxylate metabolism	5/65	30/8157	3.35838e-06	2.79556e-05	1.80903e-05	MDH2/DLD/ACAT1/PCCB/GRHPR	5
hsa05022	Pathways of neurodegeneration - multiple diseases	15/65	476/8157	3.43716e-06	2.79556e-05	1.80903e-05	CYC1/COX5A/UQCRC2/SDHD/NDUFS1/SLC25A4/NDUFA6/NDUFS6/NDUFA10/NDUFB7/VDAC3/NDUFA3/COX7B/BID/CASP8	15
hsa00380	Tryptophan metabolism	5/65	42/8157	1.86238e-05	0.000142006	9.18936e-05	DLD/ACAT1/ALDH2/ALDH7A1/MAOA	5
hsa00071	Fatty acid degradation	5/65	43/8157	2.09454e-05	0.000150314	9.72696e-05	ACAT1/ACADSB/ALDH2/ECI1/ALDH7A1	5
hsa05014	Amyotrophic lateral sclerosis	12/65	364/8157	2.45906e-05	0.000166669	0.000107853	CYC1/COX5A/UQCRC2/SDHD/NDUFS1/NDUFA6/NDUFS6/NDUFA10/NDUFB7/NDUFA3/COX7B/BID	12
hsa00410	beta-Alanine metabolism	4/65	31/8157	9.83092e-05	0.000631248	0.000408487	HIBCH/ALDH6A1/ALDH2/ALDH7A1	4
hsa00640	Propanoate metabolism	4/65	32/8157	0.000111684	0.00068127	0.000440857	DLD/HIBCH/PCCB/ALDH6A1	4
hsa00310	Lysine degradation	5/65	63/8157	0.000135297	0.000786011	0.000508635	DLD/ACAT1/ALDH2/ALDH7A1/AASS	5
hsa00260	Glycine, serine and threonine metabolism	4/65	40/8157	0.000270591	0.00150055	0.000971019	DLD/GRHPR/ALDH7A1/MAOA	4
hsa00340	Histidine metabolism	3/65	22/8157	0.000667505	0.00352237	0.00227936	ALDH2/ALDH7A1/MAOA	3
hsa00330	Arginine and proline metabolism	4/65	51/8157	0.000692925	0.00352237	0.00227936	ALDH2/LAP3/ALDH7A1/MAOA	4
hsa01212	Fatty acid metabolism	4/65	57/8157	0.00105684	0.00515737	0.00333738	ACAT1/MCAT/ACADSB/HSD17B4	4
hsa04723	Retrograde endocannabinoid signaling	6/65	148/8157	0.00110324	0.00517672	0.0033499	NDUFS1/NDUFA6/NDUFS6/NDUFA10/NDUFB7/NDUFA3	6
hsa00650	Butanoate metabolism	3/65	28/8157	0.00137236	0.00620104	0.00401275	ACAT1/OXCT1/ACSM1	3
hsa04217	Necroptosis	6/65	159/8157	0.00159602	0.0069541	0.00450006	SLC25A4/VDAC3/GLUD1/BID/GLUD2/CASP8	6
hsa00010	Glycolysis / Gluconeogenesis	4/65	67/8157	0.00193228	0.00812891	0.0052603	DLAT/DLD/ALDH2/ALDH7A1	4
hsa04215	Apoptosis - multiple species	3/65	32/8157	0.00203118	0.00826014	0.00534522	DIABLO/BID/CASP8	3
hsa00250	Alanine, aspartate and glutamate metabolism	3/65	37/8157	0.00309302	0.0121725	0.00787697	NIT2/GLUD1/GLUD2	3
hsa04260	Cardiac muscle contraction	4/65	87/8157	0.00498373	0.0190005	0.0122954	CYC1/COX5A/UQCRC2/COX7B	4
hsa04979	Cholesterol metabolism	3/65	50/8157	0.00724961	0.0268016	0.0173436	VDAC3/CYP27A1/TSPO	3
hsa00120	Primary bile acid biosynthesis	2/65	17/8157	0.00787262	0.0274417	0.0177578	HSD17B4/CYP27A1	2
hsa00910	Nitrogen metabolism	2/65	17/8157	0.00787262	0.0274417	0.0177578	GLUD1/GLUD2	2
hsa00480	Glutathione metabolism	3/65	57/8157	0.0104042	0.0343057	0.0221996	GSR/LAP3/MGST3	3
hsa05134	Legionellosis	3/65	57/8157	0.0104042	0.0343057	0.0221996	BCL2L13/BNIP3/CASP8	3
hsa00220	Arginine biosynthesis	2/65	22/8157	0.0130343	0.0398793	0.0258063	GLUD1/GLUD2	2
hsa00900	Terpenoid backbone biosynthesis	2/65	22/8157	0.0130343	0.0398793	0.0258063	ACAT1/FDPS	2
hsa00561	Glycerolipid metabolism	3/65	62/8157	0.0130752	0.0398793	0.0258063	ALDH2/ALDH7A1/AGPAT5	3
hsa04964	Proximal tubule bicarbonate reclamation	2/65	23/8157	0.014203	0.0422625	0.0273484	GLUD1/GLUD2	2

## Sheet: Figure 2B
ID	Description	GeneRatio	BgRatio	pvalue	p.adjust	qvalue	geneID	Count
mtDNA maintenance	mtDNA maintenance	7/52	31/1035	0.000555932	0.000555932	0.0251632	POLQ/RECQL4/DNA2/PIF1/MGME1/POLB/UNG	7
Vitamin metabolism	Vitamin metabolism	8/52	49/1035	0.00215086	0.00215086	0.0398794	SFXN1/CYP27B1/FLAD1/MTHFD2/SHMT2/MTHFD1L/AKR1B10/DMGDH	8
Folate and 1-C metabolism	Folate and 1-C metabolism	5/52	21/1035	0.00290661	0.00290661	0.0398794	SFXN1/MTHFD2/SHMT2/MTHFD1L/DMGDH	5
Amino acid metabolism	Amino acid metabolism	11/52	90/1035	0.00352423	0.00352423	0.0398794	PYCR1/SFXN1/AGMAT/SHMT2/MAOB/OAT/NAT8L/KMO/SLC25A21/GLDC/DMGDH	11
