# Supplementary material for: Dissecting the alternation landscape of mitochondrial metabolism-related genes in lung adenocarcinoma and their latent mechanisms
Source: Aging (Albany NY). 2023 Jun 15;15(12):5482–96. doi: 10.18632/aging.204803 (PMC10333067; doi:10.18632/aging.204803)
Supplement: Supplementary File 2 [file aging-15-204803-s002.xlsx]

## Sheet: TCGA
Supplementary File 2. The survival outcomes from TCGA and GEO databases.
Gene Symbol	HR	Low.High	up95	low95	p.val
CYC1	1.61088267060045	262:253	2.15295619179087	1.20529297731893	0.00136907506890593
SDHB	1.32896777785731	434:81	1.94016219777515	0.91031324938106	0.106388919366972
COQ7	0.796345118213075	232:283	1.0670948211356	0.59429165500674	0.122225838452437
SDHA	1.72616855228821	82:433	2.51111536740746	1.18658740637035	0.0168563814826661
UQCRC1	1.46971005931114	224:291	1.96850269668729	1.09730490188071	0.0123659259755193
COQ5	1.85904883493384	105:410	2.61581467202981	1.32121843631492	0.00279756463252967
PDHA1	1.42185211737705	231:284	1.90131648673585	1.06329664618875	0.0202760327214107
COQ9	1.70095679458045	105:410	2.41348675813395	1.19878595035938	0.0109662518235879
MRPL12	1.77835821157546	261:254	2.37631631906671	1.33086571989707	0.000131542592448408
COX5A	1.7897608433698	181:334	2.41402625361407	1.32693000818204	0.000520970515962782
ISCA2	1.37290379733364	228:287	1.83564603609507	1.02681279487998	0.0349787486511094
PMPCB	1.48155168162294	217:298	1.98406788342194	1.10631062760515	0.0108611603643336
UQCRFS1	2.01940594103069	460:55	3.3922812415363	1.20214099725505	0.000359862917736264
OGDH	1.93870059099188	457:58	3.17628792001948	1.18331841324045	0.000609015672034974
PDHB	1.41844687027829	135:380	1.99343498362034	1.00930882638983	0.0669807184555163
UQCRC2	1.55361428636825	441:74	2.41119963105693	1.00104417722953	0.0205096223995285
SDHD	1.6091978171081	295:220	2.1612282345184	1.19816943589139	0.00111998924870416
MRPS35	1.73352412894108	344:171	2.38874943740459	1.25802474657451	0.000194538901399199
UQCRQ	1.69443956745252	171:344	2.29628107080599	1.25033711432413	0.00200859026367739
MRPL53	1.27247090427854	189:326	1.70798702536271	0.948006148870824	0.116018483301528
DBT	0.712687174242081	116:399	1.01632094863003	0.499766347445487	0.0397601140317668
PDK4	0.649904852572445	52:463	1.05091088776605	0.401914493716082	0.0364769895729732
MDH2	1.79432676774479	224:291	2.40035432578184	1.34130553763007	0.000186502126992338
MRPS27	1.504842843936	173:342	2.03957211062085	1.11030738906115	0.0140902401394229
CS	1.63158131313564	51:464	2.52048066013328	1.05617060407543	0.0658642420373581
GRPEL1	1.70978992036262	332:183	2.32859440735521	1.2554275500017	0.000244334248205025
DLAT	1.41850057169839	311:204	1.91522607917414	1.05060383930043	0.0177542645913127
LRPPRC	1.65933009764592	105:410	2.33168881374315	1.18085070217132	0.0112324975113069
DLST	1.79773486146852	145:370	2.45707862583622	1.31532243134439	0.00109869288463482
PDHX	1.55239612148366	423:92	2.2757880828289	1.05894469532588	0.0097124358507672
GFM1	1.5590812519056	201:314	2.08987175813708	1.16310215714399	0.00440651174053286
MPC2	1.35595435957153	415:100	1.94378848736944	0.945891097302093	0.0693262402342003
NDUFS1	1.5394462896802	398:117	2.19201079534568	1.08115109827111	0.00711612376757442
MRPL46	1.56740664153501	355:160	2.1519203133175	1.14166103861932	0.00258194685894975
SLC25A3	1.82917447439171	364:151	2.53015120688977	1.32240288590465	4.2058823224389e-05
MRPS23	1.3443789540915	203:312	1.80657963842071	1.0004290615077	0.0574525295372753
FH	1.67373178079503	458:57	2.70633984998625	1.03511688454706	0.00999297324602311
PMPCA	1.2692237724898	225:290	1.69719708600397	0.94917025131486	0.112341028702056
UQCR10	1.20722732818128	168:347	1.64071513318632	0.88826987234365	0.243659522138465
ISCA1	1.38072063818752	198:317	1.85815848935787	1.02595633883509	0.0410192538808198
SUCLA2	1.57450721812702	387:128	2.22977607844104	1.1118035590674	0.00391161673728269
COQ3	1.54836067489612	377:138	2.15635660377053	1.11179235167909	0.00434759662147277
IARS2	1.70164460338168	78:437	2.47967768229997	1.16773013560869	0.0199793840351578
MRPS15	1.46776590319838	278:237	1.96453736694869	1.09661276127207	0.00911905437271943
IDH3A	1.3415495580163	105:410	1.87693835336041	0.958878171673312	0.111212238493101
COX11	0.742996011919926	427:88	1.07059006060693	0.515643750153961	0.145452593141961
ETFDH	1.33836951335091	439:76	2.04052637534164	0.87782886607739	0.132110854952205
TIMM10	1.3989816999811	391:124	1.97360995850357	0.991659871014206	0.0372198553603095
MRPL34	2.09636093119268	77:438	3.11981178055102	1.40865201587734	0.00487649266939627
MRPL2	1.27900611951038	191:324	1.72593759884953	0.947807530721519	0.119718203649015
BCKDHA	1.27091218760105	222:293	1.69873509320006	0.950835592352523	0.108065111267072
UQCRH	1.4219996089368	350:165	1.94339743711758	1.04048860474755	0.0191203617320381
HIGD2A	1.43996681971281	338:177	1.95946026255848	1.05820183317545	0.0143426112764694
ECHS1	1.40296768496213	451:64	2.1190484469414	0.928868959031605	0.0696690935375847
LETMD1	0.650986309899885	82:433	0.968248772153253	0.43768005482169	0.0142423057529257
COX6A1	1.70942207401599	85:430	2.48964838962123	1.17370944399812	0.0191954550946953
COX15	1.48643898867219	393:122	2.10382459678091	1.05023055174162	0.0131008717972869
AFG3L2	1.58469254899799	392:123	2.26942119208569	1.10655989448209	0.00419317304230693
HADHA	1.55724015224171	311:204	2.10299954408233	1.15311337017524	0.00249192895439154
ETFA	1.92060157551975	63:452	2.86493023442053	1.28753935002366	0.0108610343858613
NDUFS7	1.37264104190277	119:396	1.91140945243125	0.985735122068874	0.0825665209531643
CPT2	0.628489102591562	105:410	0.927758187314454	0.425755932394124	0.00629612636582311
BCKDHB	0.725229501385463	194:321	0.979807454507858	0.536797130150421	0.0297802935508789
IDH3B	1.47673631160081	303:212	1.99355962919848	1.0938976201465	0.00774602835404126
LARS2	1.63655918715591	409:106	2.41536156249947	1.10887165493054	0.00353405292364339
ACADS	0.637670644928418	78:437	0.991195790030093	0.410235652222736	0.0179286293024595
LETM1	1.69749433138698	286:229	2.27904762369075	1.26433821528686	0.000292287662172153
OPA1	1.61211655248801	147:368	2.19327918083043	1.18494708814124	0.00535272209207727
AUH	0.712189294999139	297:218	0.954296507533123	0.531505237530973	0.0276104844393384
SUCLG1	1.36901845306179	151:364	1.87337954690451	1.00044410537125	0.0658436788616154
NDUFV2	1.52878978380329	358:157	2.09267545411959	1.11684695228797	0.00446534360347794
COQ6	1.50650399325719	103:412	2.16458332194804	1.04849476510674	0.0507532563027624
MRPL43	1.36198855033625	118:397	1.92796470475638	0.962161188257565	0.110578722385583
ABHD11	0.757695760599073	145:370	1.05213484282415	0.545655216672417	0.0771939524857936
NDUFB8	1.47389714231257	206:309	1.98430761089703	1.09477622027318	0.0150136857063095
LONP1	1.26249867533394	277:238	1.69049565791534	0.942861283172708	0.112182493827189
DLD	1.6160621555588	233:282	2.16031043558769	1.2089266651711	0.00167699669287535
AIFM1	1.22756869739109	441:74	1.86910395148487	0.806228516941132	0.302063198072657
ECHDC3	0.600676609426418	462:53	0.924923934294739	0.390099526819078	0.0549856504033278
APOOL	0.793022425343455	163:352	1.08069007488141	0.581928696963951	0.127234354549772
MRPL10	1.65915126396054	370:145	2.29390732664861	1.20004103248742	0.000703564501620568
MRRF	1.55184983145151	437:78	2.39369777688453	1.00607433512784	0.0195443824930664
NDUFS8	1.54340524688017	127:388	2.14708673072845	1.10945669870032	0.0212584916890735
ACADM	1.55250552170465	462:53	2.55987532046387	0.941558901582234	0.0389158200096081
IMMT	1.7185513586041	204:311	2.29956402356079	1.28433857109433	0.000516015284904747
TIMM9	2.06536614183553	143:372	2.82966293430643	1.50750721865964	0.000135353825888807
SLC25A4	0.695278667301304	127:388	0.991229895724145	0.487689513088302	0.026255840667411
SAMM50	1.93371967423879	349:166	2.6859630858417	1.39215307844278	6.7483555603598e-06
NDUFS2	1.5824171613583	149:366	2.15859219466064	1.1600357301185	0.0083039511455546
NDUFV1	1.58031710847989	58:457	2.48551690022978	1.00478180740729	0.0962311079489918
ACO2	1.69784595365825	395:120	2.44266752824858	1.18013640784777	0.000875839220565777
SUPV3L1	1.29881721896497	386:129	1.82014276984127	0.926809806478538	0.105408157209925
FECH	1.35492942929577	378:137	1.88913451893662	0.971785619271385	0.0548137769412349
MTIF2	1.76204886953388	229:286	2.3551982967671	1.31828229618182	0.000231346688282397
PHB	1.81111389445441	167:348	2.45731519004528	1.33484444810899	0.000646326441323897
HIBCH	1.39834157324739	409:106	2.01124578079614	0.972212930981499	0.0461563810259503
MRPS2	1.62638242206716	245:270	2.17304543019558	1.21724090350517	0.00121839758853659
HSPA9	2.67054716584997	70:445	3.97364885808718	1.79477916135307	0.000605273833970021
SURF1	1.30412751506018	109:406	1.85391496654587	0.91738219186276	0.170909529533765
PRDX3	1.49101538097579	148:367	2.04904038761786	1.08496000359022	0.024220707832736
GHITM	2.02512883133026	93:422	2.95052135053005	1.38997360000406	0.00364403048595685
GUF1	1.55686660528221	409:106	2.28316226045246	1.06161251376089	0.00900540880166067
TIMM13	1.38300370476438	349:166	1.88957000721553	1.01224047803899	0.0314677282171002
LYRM4	0.768538637884267	402:113	1.07192141021665	0.55102140165446	0.145966896714884
MRPL16	1.67673472446174	268:247	2.24423821646046	1.25273659257523	0.000451684375350592
MRPL40	1.32908684907915	356:159	1.81416838387948	0.973708872942466	0.059954280640681
IDH3G	1.25121456792496	115:400	1.75592490502912	0.891574514663932	0.221423468774563
SDHC	1.55495255309702	449:66	2.4448252631858	0.988977608662415	0.0235458670014719
NDUFB5	1.59432047899295	358:157	2.18807103100919	1.1616888819939	0.00170226104642546
SDHAF2	1.46510416559731	335:180	1.98074098192809	1.08370061286919	0.00956992346655139
COQ10A	0.628634851439733	99:416	0.903218986649215	0.437525984601709	0.00419326867928682
TXN2	1.48778158774014	113:402	2.10389248246514	1.05209466323346	0.0448106877561044
MRPS18A	1.39518149530362	225:290	1.8688217190178	1.04158218252124	0.0301596497575742
COX6C	2.48499336146929	61:454	3.78658500745391	1.63080770519889	0.00240137074508051
NDUFB9	1.72631823357415	76:439	2.58956869879124	1.15083822451269	0.0298453961338435
MTCH2	1.55187975810055	261:254	2.07553167285763	1.16034402900072	0.00292509149927567
NDUFA6	1.68732603546021	189:326	2.26766984447108	1.25550425997129	0.00117743949264382
SLC25A20	0.696579231322559	182:333	0.947731904885775	0.511983001741836	0.0151693873971825
MRPL1	1.65897134189129	134:381	2.29520565218106	1.19910209815023	0.00691924210678863
TIMM44	1.26332938636253	425:90	1.84012275361275	0.867334059814038	0.189208053874794
COX17	1.34655368343237	354:161	1.83028566487711	0.99066875579065	0.0466229086533579
SOD2	1.7890520469925	459:56	2.98191598915302	1.07337270348692	0.00450171371836727
COX6B1	1.75610559995673	139:376	2.40352080139376	1.28307892172644	0.00189859550003724
VDAC1	2.01131747121463	241:274	2.68736331472515	1.50534092202824	5.20829820094271e-06
CLPP	1.66003694308949	71:444	2.46145955909763	1.11954821367537	0.0338685475930078
HADH	0.742602178770565	214:301	0.999212810497958	0.551892439849695	0.043678249348448
ACADL	0.567045289841253	445:70	0.840762981255751	0.382438770378428	0.0191960324731705
ACAT1	0.643709180321811	268:247	0.860101255844486	0.481758985950717	0.00310352628790367
MALSU1	1.65342944594239	291:224	2.21722727132387	1.23299445576323	0.000611172219209921
CLPX	1.82010796981937	461:54	3.01751730576738	1.0978538600154	0.00303928244391571
NDUFS4	1.53882306563793	109:406	2.16151293845584	1.09551804442631	0.0269228460708635
MRPL4	1.41660249930627	354:161	1.95284394228249	1.027610346936	0.0227772028099593
C1QBP	1.64892122928543	303:212	2.21757411328109	1.22608809514162	0.000613043242377542
PITRM1	1.3411259086609	464:51	2.26219110779069	0.795078142022275	0.212813427550024
UQCC1	1.83843916667666	104:411	2.58943639312194	1.30524873232968	0.00341795103729292
MRPL55	0.746742358690047	73:442	1.15262412643358	0.483786637355372	0.141564913256728
MRM1	1.82987610813313	448:67	3.06457102453488	1.09263141376358	0.00307839912078944
MECR	2.37201410665556	54:461	3.70123807165241	1.52015374673293	0.00608686533584879
MRPL44	1.6646687064545	341:174	2.28111127176408	1.21481224372972	0.000549874155533425
HSDL2	0.701964469065873	128:387	0.991976132089264	0.496739891103139	0.0275698984306155
MRPS14	0.823057417504604	173:342	1.12078465092116	0.604418977323237	0.200477123374879
ABCB8	1.29460073317544	243:272	1.72975866381858	0.96891612303794	0.0823633165249468
ATPAF2	0.682715285277624	54:461	1.1467494346005	0.406453359982762	0.0901391445761435
NDUFA9	1.92092974100895	168:347	2.60300567230661	1.41758087934664	0.000194208024168696
COA6	1.93785348396626	417:98	2.83106007982567	1.32645582200129	3.19319108990079e-05
POLRMT	1.62461446920823	51:464	2.57897826754261	1.02341776461562	0.0879907154959948
ISCU	0.518617069520357	453:62	0.811051752157576	0.331623307738847	0.0248612504022119
RTN4IP1	1.44614890183494	367:148	1.98692690791813	1.05255338681264	0.0148852405729499
OGDHL	1.5683628206153	62:453	2.46998464803795	0.995861224903686	0.102230250580314
BCKDK	1.35928581821301	87:428	1.95646285054643	0.944386925148608	0.132323745472058
GFM2	1.46239206973203	355:160	2.02048440158802	1.05845438051107	0.0127187280358169
NDUFAF4	1.71677015319354	460:55	2.89119642056427	1.01940488647982	0.0106650147541003
SLC25A35	0.65303491510201	68:447	1.02403900997237	0.416443705942215	0.028801482022753
SLC25A11	1.64726009927342	83:432	2.46529653186403	1.10066509224617	0.0416413431781592
TIMM8B	2.35672159920574	90:425	3.42473444431512	1.62177149395698	0.000711426892539668
MCAT	2.34199756352012	72:443	3.55063379713268	1.54478127030829	0.00323320115460202
IBA57	1.30673465933634	392:123	1.87750164260767	0.909482810113145	0.115568407234607
PHB2	1.70348188500052	241:274	2.27668746298436	1.27459327628619	0.000493289048229206
DAP3	2.32920615456383	82:433	3.36336375441437	1.61302841636963	0.000584092305670358
CMC2	1.73325188042335	135:380	2.39048608659538	1.25671598669278	0.00333736770368209
SDHAF1	1.45987557154736	447:68	2.25652132878501	0.94447885655406	0.04911667542751
MRPS17	1.53664538771507	327:188	2.07973676776377	1.13537399741457	0.00339276665342914
ADHFE1	0.633862402313241	341:174	0.857304421430929	0.468656798008459	0.00606280283938887
NFS1	1.43703359410861	97:418	2.06545985815337	0.99980909454371	0.0790102680658149
NDUFAF5	1.17575969390554	298:217	1.57977141307898	0.875070181905959	0.275445074225355
MRPL17	1.63305550199393	241:274	2.18328924613727	1.22149196553363	0.00136937936957571
TACO1	1.59523726681696	377:138	2.22269213904422	1.14490976628727	0.00216414709401203
MFN1	1.23369223497837	307:208	1.66253118594446	0.915469462175113	0.157274500729608
PPTC7	1.98356376035144	423:92	3.00710321855348	1.30841042206466	4.38339980166624e-05
MRPL11	1.6660838632375	402:113	2.37267894623245	1.16991615901009	0.00116974297331018
COX4I1	1.55970814953422	120:395	2.18824711542741	1.11170694322991	0.022756661020495
NDUFS6	2.41322865672702	54:461	3.82761238672097	1.52148962884863	0.00773215080307887
MRPL13	2.15866316994721	213:302	2.88879565501081	1.61306898714133	1.72295850375814e-06
OXCT1	0.618215373704491	55:460	0.993172896424492	0.384817436783163	0.0162825488741757
COX5B	2.10327239586567	101:414	3.01108177267341	1.46915796553837	0.00129796959684325
PDK2	0.63690032816571	153:362	0.883037512721853	0.459371229617696	0.00295797794401442
ALAS1	0.559607609204625	55:460	0.924256383677919	0.338824466684825	0.00408459830751129
MRPL33	1.50723678077143	96:419	2.14586393727004	1.05867043751169	0.0418839833362156
MTO1	0.653319898146859	458:57	1.03332519600956	0.41306153277102	0.121955385225606
LIAS	1.44301171655922	455:60	2.28756050433044	0.910263492565706	0.0718798842980342
NDUFA5	1.32940799718342	416:99	1.92004379549117	0.920461099442333	0.0973705223537057
NDUFB6	1.38220103267926	169:346	1.87593804303317	1.01841300240949	0.0496550355394739
MTX2	1.65560422720629	400:115	2.36240557695902	1.16026874634781	0.00143379164963009
SUCLG2	1.4918220257377	267:248	1.99401479102079	1.11610654369161	0.00697870642435727
FDX1	1.52568702258454	323:192	2.06234591296948	1.12867626921581	0.00402716520683033
SLC25A1	1.6789608133687	157:358	2.28677665921256	1.23269992348023	0.00307719094825876
MRPS28	2.0122421593054	69:446	3.08154581200286	1.31398939191961	0.0130649843446836
TIMM50	1.66488046776855	315:200	2.25254981834027	1.23052859891888	0.00048245616191811
VDAC2	1.95881527887436	325:190	2.66836207125325	1.43794477446966	3.13981353683435e-06
SLC25A42	0.554732071432533	266:249	0.741515494713304	0.414998301815402	7.74593151462444e-05
TOMM7	1.61804902510018	89:426	2.33029122342129	1.1235001965908	0.0262111182911272
ECH1	1.44170980470848	241:274	1.92759281751819	1.07830198478779	0.0155805457353192
GATB	1.65983434024343	195:320	2.23795887082526	1.23105481202851	0.00212183434549984
BCS1L	1.39422706599252	281:234	1.8689295287287	1.04009759686786	0.0232514047633048
ERAL1	1.57780256295768	414:101	2.30117022148262	1.08182389309379	0.00647055938204455
CMC1	1.4757427328525	258:257	1.97237194977193	1.10416121757298	0.00865886704232055
MRPL28	1.73932785181641	199:316	2.34132509647389	1.29211504231533	0.000778257134004812
TSFM	1.47157922209726	369:146	2.0340933578592	1.06462439324198	0.0111215825772601
FXN	1.63889130368483	76:439	2.4342851267591	1.10338952317789	0.0390676877810264
NFU1	1.64710956729299	220:295	2.20455887761776	1.23061804073917	0.00133691106821743
YARS2	1.86106226604746	301:214	2.50941112132188	1.38022531608181	1.88190053784787e-05
MRPL21	1.62846980962105	268:247	2.17805704366466	1.21755944297275	0.000978417594019176
ALDH4A1	0.608450704231252	424:91	0.87036686261014	0.425351969822562	0.0188121303839907
TOMM40L	1.29732223012089	150:365	1.77186030001985	0.949874529468815	0.119886673145761
NDUFAF1	1.2584405554599	188:327	1.70099690071366	0.931026171159865	0.148584131841273
NDUFB10	1.37443334696446	367:148	1.88506850653892	1.00212115299531	0.036236085923305
ACADSB	0.574197535749629	158:357	0.792733762983836	0.415906102977059	0.00018489120035392
MRPS9	1.6015434518206	217:298	2.14158177082555	1.19768549723913	0.00210174566950339
ACADVL	0.691021082366074	442:73	1.05403936693636	0.453028749450126	0.133307176918153
COQ4	1.23689241784601	174:341	1.67901439008991	0.911191031092366	0.187978131744038
MRPL15	2.42748481228731	84:431	3.48922634440128	1.68882208611683	0.00029318326124228
NDUFA2	1.67044622229219	57:458	2.68013013577454	1.04113995970716	0.0817190085961531
MRPL24	2.20022379183953	54:461	3.47813420464822	1.39183379632309	0.0127602967606386
HSPD1	1.68351891631179	329:186	2.29093799409678	1.23715087395765	0.000377932020729999
NDUFS5	0.770798917325463	311:204	1.0316646843475	0.575895424127924	0.0834221871629662
AK3	0.636030080113907	455:60	0.977286163364747	0.413936345335037	0.0802211074030642
CYCS	1.83118879357811	335:180	2.49139243532372	1.34593504828168	3.1389836524176e-05
MIPEP	1.61704599014205	458:57	2.59765563040708	1.00661446560748	0.0163510443881623
LYRM7	1.2182575658944	238:277	1.62861862610981	0.911294684381724	0.186315528469112
CRAT	1.36845124792041	66:449	2.08599124709505	0.897730908767133	0.19300191807169
PCCB	1.4540099383563	360:155	2.00153694109754	1.05626074514498	0.0136109831621867
MRPS7	1.50460107385317	260:255	2.0106480383012	1.12591778785551	0.00579090313757313
MRPL3	1.6601970137404	196:319	2.22891574386625	1.23658964320095	0.0015035602410941
PRODH	0.678994687667045	106:409	0.982295654466913	0.469343200067671	0.0209850478022022
PCCA	0.718215179263971	254:261	0.960143831225887	0.5372455948257	0.0250631177595797
MCCC1	0.710721283623291	167:348	0.974777584314631	0.518194869397097	0.0242167391451069
MRPS12	1.72942569492205	298:217	2.32456817969165	1.28665326334002	0.000177308278357047
CLPB	1.28040065329017	301:214	1.72249873810653	0.95177186297857	0.0948319434926941
PDK1	0.647926552757699	429:86	0.94352021469253	0.444938869598338	0.0492942276411429
MRPL49	1.29789878516796	107:408	1.85316607316551	0.909007174766044	0.184050653869363
COX7A2	1.47769456754993	278:237	1.97736178479275	1.10429019704931	0.00807217868050203
TMEM126A	1.51292876929828	237:278	2.02236213615969	1.13182175439507	0.0063623394270822
ECHDC2	0.612525424211798	150:365	0.84452245191309	0.44425982335453	0.00103302126775973
HCCS	1.57127451150211	273:242	2.10179405095612	1.17466484852457	0.00216700659959501
HIBADH	1.75120294839455	433:82	2.65368257423876	1.15564378205464	0.00135325269279807
MRPL19	1.63278945078593	329:186	2.21843192945617	1.20175036934822	0.000841900653245409
MRPL36	1.39058428975272	146:369	1.91588979447965	1.00930892396776	0.0615473406317879
SLC25A30	0.67361933841055	68:447	1.05074894424393	0.431847222465852	0.0434482422171359
BDH1	1.32445011905649	359:156	1.80516972937874	0.971746916270551	0.0626291148813062
FARS2	0.643976588993078	325:190	0.862841059821373	0.480628317870052	0.00458804824419623
ABCB7	1.28398698875729	100:415	1.80324775677096	0.914251844266905	0.174807586241033
MTX1	2.17170719758824	77:438	3.21664587448617	1.46622050921597	0.00312587123627928
NDUFA7	0.846534788964995	218:297	1.13832413175032	0.629540505151298	0.262099557341311
TIMM17A	1.58953340608432	196:319	2.13665642204589	1.18250946805885	0.0037898041633071
ALDH9A1	1.44284939801323	452:63	2.32416892441296	0.895724214999979	0.0810359142847759
MRPS18C	1.59160112618772	266:249	2.12819228772012	1.19030322565249	0.00168909102372361
MARS2	1.27007294001732	384:131	1.78902789240268	0.9016546247347	0.145142070647297
ALDH6A1	0.635101065330034	266:249	0.848630205093074	0.475299324443803	0.00238774488597315
FDXR	0.811206179707741	126:389	1.14533302939464	0.574553818939317	0.208930553314062
GATC	1.60760702060016	247:268	2.14982852922894	1.20214254185651	0.00124898176298027
TRAP1	1.61477060471993	119:396	2.25873988250801	1.15439769141206	0.0139666014432343
ACAD8	0.588769717934506	102:413	0.860499419908992	0.402847198657426	0.00130164956190626
ALDH2	0.516957543086139	451:64	0.770379094219745	0.346900770489272	0.00991418135322064
PPIF	1.78500360761913	410:105	2.60711702248075	1.22213074892261	0.000349898692492467
TIMM22	1.62252717535968	361:154	2.22292833201876	1.18429118782694	0.00109629318271975
IVD	0.592619417139699	355:160	0.804410216442225	0.436590394294452	0.0023186615760884
L2HGDH	1.38215718984435	345:170	1.91519256853233	0.99747593470582	0.0359783059382422
ETHE1	1.76254954122934	402:113	2.53891364730625	1.2235866661254	0.000359410016642525
MRPL20	1.28418993518423	157:358	1.75792218872504	0.938121038693155	0.137623060014622
SLC25A5	1.6063786079033	52:463	2.4878521256066	1.03722090447807	0.0736900627366387
SLC25A12	0.708477614451876	127:388	0.997897981549912	0.502997840921392	0.0311316591351549
MRPS21	0.84561937154346	278:237	1.1300100329943	0.63280156870356	0.258206940279994
TOMM22	1.69466920371127	249:266	2.26428068345192	1.26835145969144	0.000470775904456877
ACAA2	1.41553626571832	429:86	2.11960916115511	0.945336034720569	0.0574227108201872
MRPL30	1.44285164369593	291:224	1.9378310926189	1.07430460458891	0.0124837072993169
DNAJA3	1.52618327467452	377:138	2.1230305778725	1.09712757422005	0.00585528039446459
NDUFB2	1.38963060234308	262:253	1.8573652879785	1.039684128624	0.0259619959972045
MRPS34	1.66736945490258	226:289	2.23424085903858	1.24432461607494	0.00116148845712483
ETFB	1.61230279444412	303:212	2.17658576104764	1.19431099269946	0.00107081566962497
COX7C	1.40736814057325	252:263	1.88041183085698	1.05332515494648	0.0217879423560846
CHCHD3	1.79894631233266	230:285	2.40571531704181	1.34521645671471	0.00016004173850126
COQ10B	1.42622816158889	64:451	2.22673563363695	0.91350169197538	0.171717418213859
ACSF3	0.76386855536438	317:198	1.0258467147918	0.568793720797641	0.0814669086943706
POLDIP2	1.75312547129996	458:57	2.88423838165188	1.06560155972977	0.00544587185561396
SLC25A10	1.37742188622391	231:284	1.84465413496921	1.0285348438396	0.0360031102983792
SLC25A13	1.36490664583169	234:281	1.82432500391889	1.02118325837425	0.0381526717769951
PDK3	0.808329440177564	74:441	1.19400805113294	0.547229546097111	0.248461644223825
ME3	0.68397623027865	75:440	1.03403676905526	0.452424418150639	0.0396692948508256
MRPL22	1.65474966986979	349:166	2.25779411869238	1.21277509196455	0.000618768021894756
IDH2	0.805277565810121	306:209	1.07818272489394	0.601449033660659	0.15119081387558
GCDH	0.542288496657202	125:390	0.772385350247766	0.380738466249255	6.88128758592477e-05
MRPL47	1.79455122655163	239:276	2.39804320345127	1.34293414734277	0.000129540276281648
PPA2	1.47735288372337	122:393	2.06884156335849	1.054972783659	0.0408582072074576
MRPL9	1.73555771183576	204:311	2.32493961982232	1.29558658015505	0.000486275903513134
CHCHD10	1.4548596910881	324:191	1.96631892075389	1.07643612560136	0.0109488347761277
WARS2	1.9712880670904	443:72	3.21580732825161	1.20839846632409	0.000346978765910833
SLC25A19	0.710017890152719	84:431	1.04834199480048	0.4808787655529	0.0539610530691484
CBR4	1.24738330322711	65:450	1.88098855325555	0.827206046776183	0.329322549740645
SMDT1	0.686154210108357	371:144	0.930142585675913	0.506167126739282	0.0219508532616887
HAGH	0.406690871237249	51:464	0.73799386622058	0.224117668612542	9.92061324067706e-06
COX7A1	0.727448401504869	79:436	1.09002982118541	0.485474036184168	0.0851593174770584
MTG1	1.38864315218537	463:52	2.28246306125333	0.844846007300751	0.138355950688282
COX14	0.645815126728928	139:376	0.913127629233423	0.456756716760438	0.00550007082348136
NDUFA12	1.65215255834771	168:347	2.2328960224431	1.22245194071702	0.00264297240020195
MRPS16	1.65767065349381	242:273	2.21639577711667	1.23979301162057	0.00101087423622648
MTERF2	0.610008350361884	66:449	0.938540430055377	0.396477525735648	0.00714573505593652
GPD2	1.68389410960712	410:105	2.46696052293671	1.14938984471229	0.00164914325209009
NDUFA10	1.52781860088584	241:274	2.04142362710149	1.14343228236612	0.00479579097031368
NDUFC2	1.64873862224659	54:461	2.61037191202911	1.04136082370521	0.0787098077725865
SLIRP	1.96606186082134	138:377	2.72455279377479	1.41872796497398	0.000658073789687408
TIMM21	1.48223698869682	384:131	2.09219395113803	1.05010651114156	0.0132883190781325
NDUFA8	1.65297442554766	204:311	2.21797734397633	1.23189917107818	0.00160528094041068
GLS	0.68550618671427	63:452	1.04141572888583	0.45123068433611	0.0422694826598291
NDUFB11	1.33180188628985	338:177	1.79685862865964	0.987109523273004	0.0528818960078045
DHTKD1	0.624498853644015	54:461	1.0466316072063	0.372622817348011	0.029279644828673
FAHD2A	0.752087526230109	75:440	1.13907651554013	0.496573881907055	0.136486482406988
HSD17B8	0.720241737368504	248:267	0.964541396335485	0.537818451565111	0.0248736074464958
HINT2	0.775595140418824	276:239	1.03646023438461	0.580386783674781	0.0837244398786187
MRPS5	1.62157894744447	163:352	2.19604964219268	1.1973856293019	0.00408820380616171
C6orf136	1.33980026448411	133:382	1.85951639536933	0.965339565266469	0.102943890065527
SPRYD4	0.728623303390464	461:54	1.15952195794771	0.45785413083792	0.237601637079566
LIPT2	1.31577391940059	397:118	1.85481904385335	0.93338539557915	0.0926417554549736
DECR1	1.63364477898238	166:349	2.21771832535607	1.20339685765455	0.00408537237693607
MRPS26	0.712777167667687	458:57	1.0824182130881	0.469366908839162	0.159412132280475
SLC25A15	2.14960877610232	462:53	3.7322059599738	1.23809295088542	0.000159859831632914
NDUFV3	1.32267375724076	51:464	2.09223240295032	0.836171863903073	0.282627938535611
BPHL	0.572791721470957	464:51	0.897836953505319	0.365423092583501	0.049298176703589
STOML2	1.47394533020248	402:113	2.08970830957945	1.03962587815086	0.0158675118020492
MSRB2	1.37884500401929	329:186	1.87015321449979	1.01660844168721	0.0309302429951939
LACTB	1.481835628794	140:375	2.01552752819959	1.089460104137	0.0186899551083849
TOMM40	1.81440407586105	253:262	2.42445324520002	1.35785755283954	7.94324601327556e-05
SLC25A25	0.590605284902782	460:55	0.945211403711101	0.369033425946382	0.0741202547130254
ADCK5	0.671902691936318	68:447	1.02386003679308	0.440932560318799	0.0328619537494591
ACAD10	0.833621225038698	363:152	1.13487509268039	0.61233553482412	0.260555147953033
VWA8	1.66586190898993	455:60	2.69118602412752	1.03117951525601	0.0107041325786238
CCDC90B	1.81451693768399	379:136	2.5455889567265	1.29340273434248	7.80522939124451e-05
DNAJC11	1.5308703238079	456:59	2.47304025032138	0.947644886900306	0.0388654306425515
ALKBH7	1.57283000830101	53:462	2.51152692279703	0.984976196176767	0.112104761254441
GLDC	1.30264291090443	353:162	1.79727984905567	0.944137082614674	0.0880185924187917
THEM4	1.43355398796888	385:130	2.01266863380585	1.02107073261009	0.0231456345757501
SSBP1	1.96077494946882	208:307	2.62868809434378	1.46256926058936	3.45875474787594e-05
MRPL27	2.35812155366144	64:451	3.57142673093494	1.55700723570127	0.00297367844312546
HSCB	1.36220315511382	148:367	1.86461369169949	0.995164544839724	0.0703426900576994
MRPS10	1.67900021759742	303:212	2.26266741364552	1.24589310549634	0.000359387418885859
AK4	1.98486292904005	412:103	2.92801528707905	1.34551239006939	1.83187872004886e-05
ATAD3A	1.17752870585406	234:281	1.57514052984349	0.880285807418149	0.275137672900266
MRPL37	1.6832114692596	309:206	2.27035643776783	1.24791015327647	0.00036147213633364
PTGES2	1.6650356336987	120:395	2.30924819329234	1.2005394957282	0.00713720000669971
TXNRD2	1.33696372199608	93:422	1.91908846729184	0.931417193317849	0.14874296760677
ACSM5	0.294548941520928	453:62	0.442262410586908	0.196171044326296	0.000135815877528422
CISD1	1.91028149208947	328:187	2.59039480055242	1.40873328584561	8.06218429805217e-06
MRPL41	1.35724729035532	171:344	1.83894988664978	1.00172398418799	0.0610243127338821
MRPS6	0.641157314136744	62:453	1.02309260128424	0.401804001861641	0.0265083255526734
MRPL23	1.36273308530221	176:339	1.85611837912088	1.00049731884926	0.0630601638434921
SCO1	1.52658615064645	336:179	2.08666742311943	1.1168359890632	0.00444743060092778
GCAT	0.785255369318836	306:209	1.05058497978311	0.586935856603779	0.107453439471784
MTHFD1L	1.71997066877068	254:261	2.30071675735434	1.28581629701923	0.000242535799657273
ECI2	1.21606297737015	182:333	1.65434048257461	0.893896498639093	0.228020800876245
UQCRB	1.66655856780641	242:273	2.22683848125804	1.24724693025776	0.000745753086813905
CCDC58	1.72514741475169	198:317	2.31388612143637	1.28620573633804	0.000641853731652042
MCCC2	1.59490851014885	150:365	2.18257532435172	1.16547324958912	0.00838369503994985
MCEE	0.745164728991134	85:430	1.1301487984918	0.491325101679925	0.124378661582852
MOCS1	0.512233270966011	128:387	0.732022095868837	0.358435797724271	1.2029315338169e-05
SLC25A51	0.722700824968165	92:423	1.07380695877345	0.486396999146157	0.0725049539411424
SPG7	1.55195475306848	74:441	2.3042554401308	1.04526760081562	0.0603989616058379
ATAD1	1.61641351349015	416:99	2.38180988331682	1.09697783391304	0.00459798882332596
OXNAD1	1.35174501015998	398:117	1.92040580257253	0.95147315741533	0.067893765341386
MTG2	0.774630160445591	226:289	1.03619874318377	0.579089570817537	0.0823268326738702
DARS2	1.67174290323441	277:238	2.23827678941592	1.24860533233869	0.000494594530829451
MRPL51	2.11307544596717	220:295	2.82648568788413	1.57973127530387	2.85683049627838e-06
PC	0.749348389933977	113:402	1.07914272044069	0.520341748000984	0.0906427008699989
CLYBL	1.71570400480792	362:153	2.38646111939635	1.2334750431042	0.000327560329138832
PNPLA8	1.31730142608658	380:135	1.84012274055344	0.943025706343828	0.0835866646482993
MLYCD	0.563455680219466	424:91	0.81211819864821	0.390931152755889	0.0102933897488374
PYURF	1.58594212953833	77:438	2.34792652726943	1.07124835851218	0.0490564758551978
TIMM17B	1.60024708117741	84:431	2.34962611450859	1.08987157786692	0.0401257304089677
MRPL32	1.94858684047012	103:412	2.72026291637362	1.39581753366512	0.00100848596289982
SLC25A26	0.786723139095117	322:193	1.06087947473553	0.583415281685953	0.127580542647072
NIT2	1.64104447372676	78:437	2.40196672858075	1.12117579844262	0.0303010114542139
ME2	1.2336387299689	77:438	1.82560986426586	0.833619792414558	0.327038248980338
TUFM	2.51428800228882	74:441	3.8243948163237	1.65297895799638	0.00209589332995919
SLC30A9	1.42437201151405	79:436	2.10867004054748	0.962139921453914	0.117386753370686
TAMM41	1.44128009978659	246:269	1.92604750165458	1.07852393269446	0.0135810088627707
TIMM23	1.70526572051187	209:306	2.28644962755249	1.27181073333578	0.000799794158256706
RMND1	1.43368954343073	192:323	1.92718382219829	1.06656442590826	0.0221026053999339
MFN2	0.780813083769045	349:166	1.0608675181859	0.574689168377473	0.129516696110065
DNLZ	1.28514266196372	306:209	1.73927499696412	0.949586272718247	0.0913394879946112
CHCHD4	2.91940236880295	63:452	4.34615046963084	1.96102510728217	0.000285446810026846
NDUFAB1	1.47331740180016	331:184	1.99231180114379	1.089520307615	0.00836357131737231
ACSM1	0.733390626051197	316:199	0.985837266749498	0.545588839579177	0.0477713159204612
COA5	0.832373894692499	111:404	1.18904888922984	0.58268949817053	0.287158020327182
COQ2	2.02847999015866	88:427	2.93407785495615	1.40239328125653	0.00280905052713509
PDSS2	1.3382124090715	109:406	1.87833859793739	0.95340235980853	0.119183937413588
EHHADH	2.27378748828179	463:52	3.92197382013889	1.31824172698933	2.80167621379279e-05
NDUFS3	1.73734676472373	72:443	2.60376464512987	1.15923449016087	0.027823579182184
ABCB10	1.46764044876161	218:297	1.96158726845318	1.0980742592909	0.010471964336634
CKMT2	0.605890071787242	146:369	0.838783540523931	0.437660923652657	0.000855205376498192
MRPS25	0.594507042198997	439:76	0.873468685815246	0.40463800129746	0.0257247776540944
ACAD9	1.30623528220555	242:273	1.74546040699777	0.97753613066103	0.0721218261880232
COX16	1.58604623761468	269:246	2.12023737871966	1.18644388269899	0.00186481181563414
FAM210A	1.60550473266199	311:204	2.16354292765997	1.19140018607718	0.00120113143276712
ACOT13	1.45363525036528	178:337	1.97340180405099	1.07076796867564	0.0249707098880408
CPT1A	1.24588118808442	306:209	1.68392210311143	0.921788443749599	0.140222713803496
DHRS4	1.8209486430354	62:453	2.79733596699533	1.18536135798307	0.0284999255648589
PRELID2	1.4013919072145	247:268	1.87259519022211	1.04875804864871	0.0242676789191972
CARS2	1.25949847372126	358:157	1.73094005778389	0.916459468467759	0.136218350489812
NDUFB7	1.56807063969917	84:431	2.25440005966928	1.09068730749026	0.0341540076094797
GLRX2	1.98700472606055	252:263	2.65612824586973	1.48644471046395	5.12051498513522e-06
MRPS30	1.45062700933028	113:402	2.04140614335003	1.03081825586419	0.0539845052514373
SCO2	1.42251076974865	75:440	2.10627897673725	0.960716463678273	0.118012644009413
HSD17B10	1.35922227705385	204:311	1.82726440773333	1.01106615475054	0.0498217582390988
NARS2	0.851102986549433	239:276	1.13810639390332	0.636475023419385	0.27416259464558
RPUSD3	1.65706376119261	165:350	2.25479953653042	1.21778466962212	0.00363787147601824
SUOX	0.543981466836704	453:62	0.816439343515429	0.362446810791425	0.0173446179416732
SARDH	0.690185884778016	390:125	0.957050007753189	0.497734237174426	0.0424488192677832
COX8A	1.55030164720221	257:258	2.07139038759943	1.16030044925682	0.00342416485323738
SPR	1.54467355004238	369:146	2.13534117641819	1.11739351188966	0.00413895687660648
MPV17	1.64379767582276	68:447	2.48327697485536	1.08810689520354	0.0480213657244402
ZADH2	1.62064463800301	456:59	2.67080456417317	0.983407426331486	0.0208477111774363
MRPL18	1.55328135819965	159:356	2.1174343140895	1.13943698828174	0.0106988027179363
ALDH1B1	1.34725711462139	229:286	1.80091387598148	1.00787814292826	0.0469020328836834
CHCHD1	1.50239279390324	216:299	2.01334612952976	1.12111080855212	0.0088671091603455
TIMM8A	1.45348891351329	316:199	1.96620989171992	1.07446820942298	0.0110436856560349
VDAC3	1.77997577128333	206:309	2.38446911570757	1.32872920243948	0.000283674317593019
SLC25A24	1.55804688831827	190:325	2.09395394697956	1.15929488788414	0.00537325701755764
MPC1	0.634083608328743	165:350	0.866092010437342	0.464225529742704	0.00209693984896386
SLC25A22	1.68268456965609	411:104	2.53494407459096	1.11695851176345	0.00291352606737671
SLC25A18	1.55985946745684	208:307	2.09207992589724	1.16303470440845	0.0046613685185446
TRNT1	1.35257435045601	197:318	1.81120022500851	1.01008013815971	0.0467834781843437
IDE	1.30069975245818	366:149	1.80762893897638	0.935933149533888	0.0960728996939016
GSTK1	1.31187607394516	264:251	1.75523875019024	0.980504124127409	0.0650693087204488
VARS2	1.50474130188453	80:435	2.2118635581799	1.02368266669232	0.0697657968993197
HSPE1	2.59236361170293	53:462	4.06043139425082	1.65508253748526	0.00374531629443609
MRPL54	0.723595597579578	384:131	0.99327652277424	0.527134767440338	0.0615712706167341
MRPL38	1.35498195678103	97:418	1.92622670736076	0.95314642673485	0.119784819017495
MTCH1	1.25187539006541	119:396	1.76214606221871	0.889365544578167	0.225391620053902
TRIAP1	1.80939890242529	305:210	2.43919598220765	1.34221457069419	4.12558859890222e-05
PTCD3	0.757899518430402	66:449	1.16705922172911	0.492187259517123	0.162395704240916
COX10	1.31942921497293	267:248	1.76448708852225	0.986628615561066	0.0599746793102187
AKAP1	0.631371853391636	459:56	1.00689726882308	0.395899789976721	0.10633876123692
AK2	0.724632601084207	348:167	0.979947448653246	0.535837311761671	0.0466034111319036
TMEM70	1.4992925210412	116:399	2.08461512925732	1.07831802240202	0.0291018077637073
NOA1	1.35387957268166	251:264	1.80896289515724	1.0132821973473	0.0420878798896698
MCUR1	0.709892581489652	445:70	1.05248848220508	0.478815194441101	0.129193192014379
TMEM14C	1.97873122471726	62:453	3.03823511154915	1.28870120840473	0.0153251921365316
NDUFC1	2.03283426535435	62:453	3.26010493595377	1.26757120754759	0.0255870373980362
MRPL35	1.65947721807489	328:187	2.24707360739961	1.22553379125682	0.00053776173883624
NDUFA3	1.48405793037464	379:136	2.05993608730894	1.06917294875156	0.010320347457492
PDSS1	1.70679162508965	336:179	2.33293847559991	1.24869887566454	0.000262808913464418
SLC25A16	0.504097279206298	102:413	0.74103330355176	0.342918551278638	1.51976849736002e-05
ACSM3	0.553385883634187	52:463	0.933102358839774	0.328191149989553	0.00449058721724616
NDUFAF6	0.513387100570186	61:454	0.863428703755643	0.305255447132382	0.000882518478090732
SFXN1	1.84161693233722	415:100	2.7001958635792	1.25603959742962	0.000164742833550169
GLRX5	1.51559373687402	174:341	2.05619581358067	1.11712335959468	0.0132272887021198
PTRH1	0.59330011678497	134:381	0.827174330703589	0.425551199440202	0.000563688742549528
MRPS11	1.91989621590047	446:69	2.98154636975561	1.23627172705387	0.000225138404451042
XPNPEP3	1.96044550375974	437:78	3.05515206771643	1.25798863297973	0.00014093873714971
PDP1	1.33985802590583	375:140	1.86643048041361	0.96184644883555	0.0644032230758042
ECI1	1.54476947700722	405:110	2.189044218444	1.09011627859641	0.00601752652801746
SLC25A21	1.53986672610981	387:128	2.18694666284787	1.08424662314002	0.00676834246431834
SLC25A29	0.545440577034922	63:452	0.854885277310406	0.348006254139952	0.000912244244579363
SLC25A45	0.737986894381708	306:209	0.994673284279124	0.547541252878696	0.0547179972872228
SLC25A39	2.69313406578056	73:442	3.9579151019832	1.8325231616599	0.00032499460751112
NDUFB3	1.72577729628107	280:235	2.3101205085341	1.28924325175101	0.000214273747019655
REXO2	1.44313671758399	388:127	2.03199110213508	1.02492751245357	0.0213757878313513
GATM	1.29865417588497	455:60	2.03621452614487	0.828253922604364	0.207976048950345
TIMM10B	0.533293921194709	412:103	0.768448422881466	0.370099538127491	0.00576491685847869
SARS2	1.4296208604845	364:151	1.98237232521385	1.03099492397926	0.0205847408253128
CHDH	0.726886417113621	193:322	0.983788425834621	0.537070623631323	0.0314036530794233
MRPL57	1.3824674710639	463:52	2.1750495483179	0.878700124338723	0.112402117813111
C8orf82	1.5771466584035	98:417	2.2660214557276	1.09769109900799	0.0323276953090406
EARS2	1.29285911057994	137:378	1.78646289922592	0.935639178699881	0.142458424717158
GRHPR	1.67837836990169	94:421	2.40754032431315	1.17005473349964	0.0165156585477571
MTFMT	1.34921098776271	403:112	1.94538196639558	0.935739264033804	0.0791493306246833
PTCD2	1.53222348659622	51:464	2.36405399386126	0.99308595276308	0.0988378771434417
ECHDC1	2.12672424787912	59:456	3.22934865525099	1.40057841669174	0.00671276652109221
HARS2	1.63968600140444	121:394	2.2834698234857	1.1774056112104	0.0100909473118039
NDUFA4	1.43561167887858	311:204	1.93596625516629	1.06457480187616	0.0139379289694905
NDUFA13	1.61735555373094	67:448	2.44918942836621	1.06804273972768	0.0561746072348529
TMEM11	1.96031579444476	406:109	2.84142989905786	1.35243104720752	1.66555471843299e-05
NAGS	0.593626794704635	84:431	0.898604234772441	0.392155698532333	0.00312349147625834
HSD17B4	0.655499934017595	389:126	0.910176054341103	0.472084671364077	0.0230249657098758
NDUFAF7	0.540497525591632	54:461	0.884222434487196	0.330389236663172	0.00171574211445358
OAT	0.600043712835459	63:452	0.969441603346787	0.371401904013981	0.0105142822378791
MRPL50	1.56523768718063	101:414	2.22009442442343	1.10354270990381	0.0274357636658655
COX7B	1.45816851860729	125:390	2.03791691135918	1.04334745779174	0.0454528923448286
RARS2	0.714735800394068	458:57	1.1071167410685	0.461421316664328	0.183663719738382
OXLD1	1.20362395221298	213:302	1.61176277843067	0.898836130060877	0.218583001780041
LACTB2	1.44084978954348	238:277	1.92528718892342	1.07830568237894	0.0146149635926359
NDUFA11	1.43140472469695	72:443	2.10387240480208	0.973880108512328	0.103315620860695
AURKAIP1	1.40326033683812	235:280	1.87673604518277	1.04923629404223	0.0253740433650631
CHCHD7	0.788272309113159	132:383	1.0913272697305	0.569373872118156	0.129749169536369
SHMT2	2.07535170508343	140:375	2.8647043048812	1.50350062044932	0.000221313744103724
MTHFD2	1.62528688546477	234:281	2.17254012246653	1.21588431566675	0.00145381559354141
RMDN1	1.42370196398479	335:180	1.94585989602654	1.04166147130795	0.0187219529608266
CPS1	2.58683242304018	455:60	4.36416237495546	1.53333020404866	1.3712236446306e-07
MRPL14	0.638955670449298	457:58	0.972371686429587	0.419864496773247	0.0753477138183969
RDH13	1.2401070274332	177:338	1.67076359592109	0.920456636261203	0.167446314104731
TRMT2B	0.779231815007069	243:272	1.04227548008163	0.582573641156421	0.0906740582547936
MRPS24	1.90720264767738	268:247	2.55442723826845	1.42396772349378	1.26875852246577e-05
COA3	0.714669601306452	148:367	0.993070978564322	0.514316348031755	0.0306681858574148
GSR	1.4983191788929	381:134	2.07021863276294	1.08440737915789	0.00782359269207589
ENDOG	0.864575367666091	283:232	1.15679522579799	0.64617362667564	0.330923654592084
BCAT2	0.544769881629265	74:441	0.854014583914472	0.347504866450952	0.000889725506120209
TEFM	1.46192493222513	246:269	1.953787913036	1.09388766979339	0.0101310172785286
ACSF2	0.679799681731001	227:288	0.912416977415167	0.506487295524416	0.00828413071053191
TRMU	1.38333861127207	179:336	1.8600967575546	1.02877751152683	0.0381999927076108
MRPS22	1.56423848167944	260:255	2.09052791304451	1.1704421702762	0.00259411620443184
LAP3	1.55870857757373	448:67	2.45175939715539	0.990950593529197	0.0227759766308269
GLUD1	1.39603724766859	337:178	1.89258541377722	1.02976593959289	0.0246994061310536
HMGCL	0.734557291873129	123:392	1.06019917415647	0.508936837715693	0.0696212539865794
FHIT	0.761376946203424	195:320	1.02756947830558	0.564141760191191	0.0651599065704189
MRPS33	1.43540295627669	154:361	1.969458394481	1.04616662766864	0.0382045504411114
NUBPL	0.752886750848636	163:352	1.03344733504503	0.548492835949614	0.0633645457075117
LYRM2	1.41305135493454	417:98	2.0627995847465	0.967963221656218	0.0456477789307852
MPV17L	0.519835716834686	92:423	0.791554462164654	0.341390498586843	0.00012485013329222
GADD45GIP1	1.61451135353911	204:311	2.16768206131005	1.20250425891856	0.00264372926601675
TFAM	1.60317784300402	378:137	2.24359882123148	1.14556094965689	0.00209420908821889
ALDH18A1	2.10837226937885	94:421	3.00055917908677	1.48146840671167	0.000952404628853598
OXSM	1.31266225552796	241:274	1.75418513778434	0.98226929414311	0.0680013476122199
TARS2	1.50922114013668	116:399	2.13133051050188	1.06869790424908	0.0376644475979273
TBRG4	1.81126593691165	168:347	2.44463701734862	1.34199239843574	0.000427034002006499
TMEM65	1.58127801534903	351:164	2.1754670062478	1.14938087070273	0.00216276094207968
ROMO1	2.04884650786496	90:425	2.98092537831363	1.40821103518036	0.00310963661611585
PRDX5	0.816931934854666	311:204	1.09566593963816	0.609106993328449	0.184442440277237
DNAJC15	1.72265927269706	464:51	2.82412984826626	1.05078559742249	0.00725240154264684
HIGD1A	1.29809554600431	456:59	2.03518804066992	0.827958897597276	0.206963986715878
C16orf91	1.71896545575354	134:381	2.3850487968433	1.23890221532776	0.00478481216682891
RHOT2	0.733591024709027	441:74	1.07823208954652	0.499109418789397	0.145962014659706
SLC25A44	1.49975835789483	451:64	2.47926709683089	0.90723388978562	0.0614843515939809
OXA1L	1.31748661314801	149:366	1.8071239623831	0.960515721088228	0.106759749066957
SLC25A46	0.766581970932775	116:399	1.08529671724498	0.541462909471357	0.106931863536228
RDH14	1.73597779727109	123:392	2.4298087910253	1.24026998492607	0.0057584636395922
CA5B	0.568929153440693	147:368	0.794400491113414	0.40745239366743	0.000183858876433685
COASY	2.07150832597713	77:438	3.05886185172393	1.40285732164535	0.00438583708884732
CISD3	1.25672668364569	315:200	1.69613162034078	0.931155305665357	0.124554146703343
GSTZ1	1.40661766975864	336:179	1.90563769906822	1.03827357626513	0.0215128426461653
COX6B2	1.80980582060482	397:118	2.60715786031293	1.25630946946264	0.000168818706002494
GLOD4	1.58177107065752	452:63	2.51196538050993	0.996032723771503	0.020081037643179
ACAA1	0.720047688531582	263:252	0.962103551099251	0.538890718329954	0.0265785320478864
CROT	0.674896539691122	253:262	0.901919118898147	0.505017944229307	0.00801729529183126
PDF	1.88044738513955	195:320	2.52349993988821	1.40126112641588	0.000105316801357946
COX19	1.55049497537074	166:349	2.09611386012132	1.14690080266478	0.00787482496161196
AMT	0.585416596349482	177:338	0.797249629314394	0.4298686116369	0.000254689955673126
PDPR	0.732242559944334	390:125	1.03261820702593	0.519242410162509	0.102381298771494
NLN	1.81734747113012	97:418	2.59840191153117	1.27107042839143	0.00642350032471917
BOLA1	1.3676566182431	297:218	1.83530827671593	1.01916645239085	0.0331853990430332
GRPEL2	1.44238551507585	200:315	1.93261262075193	1.07650956625295	0.0174720492489731
ALDH7A1	1.52499429045305	124:391	2.14381217618018	1.08480006399541	0.0304791749791218
GFER	1.38993014392914	117:398	1.97095326200943	0.980188542387484	0.0929855084174653
IMMP2L	1.45055736487161	292:223	1.94521287834106	1.08168966605739	0.0113033624919865
COX4I2	0.617479220762611	143:372	0.870573625994502	0.437964781712799	0.00191755594558329
MRPL39	1.55426899307115	362:153	2.12393927543257	1.13739226481907	0.00293607549571373
AADAT	0.755294183186869	133:382	1.06273432605591	0.536793899631606	0.0835634649662353
FUNDC2	1.48041736632496	75:440	2.21227050558552	0.990672511785112	0.0947477341197047
LYPLA1	1.48874810599332	329:186	2.01804463029695	1.09827646516052	0.00690664547561481
MTRF1L	1.53116226011265	350:165	2.11184416246031	1.11014719195094	0.00470644433230882
GTPBP3	1.41578638790549	85:430	2.04839684326392	0.978546272793782	0.0976275127141341
MTHFD2L	0.69609652051047	189:326	0.946020238656238	0.512198731133973	0.0148415792635
YME1L1	1.53049361034915	390:125	2.18384551739056	1.07260823747208	0.0081174938882369
ACOT2	1.23963569471263	245:270	1.6567090361103	0.927559771879799	0.14954289192103
MMAB	0.80673310678107	109:406	1.15261223220403	0.564646363618873	0.209408565405214
PPOX	0.646313379981522	178:337	0.882967690030204	0.473087509157724	0.00324461316359037
ABCD3	0.711237153071828	120:395	1.01446501019421	0.49864537744173	0.0387305467370298
SIRT3	0.722106536710204	446:69	1.09874336607371	0.474576563063063	0.175753004071995
LDHD	0.655549252006997	353:162	0.884857318479299	0.485665669291728	0.00949224277983418
MRPL45	1.65793304588461	240:275	2.21555612534457	1.24065554160075	0.000883207932946273
C12orf65	1.23313734123167	363:152	1.69783098773591	0.895629608202459	0.179469710892227
IMMP1L	1.43909855784147	73:442	2.17713079592849	0.95125412908331	0.130697530071377
POLG	1.34170102081737	219:296	1.7929973848047	1.00399568037209	0.0483838186155082
ATPAF1	0.76177961662675	308:207	1.01978267761485	0.569050835090935	0.0726651017452241
BLOC1S1	1.27773109519042	252:263	1.70754497941096	0.956107611396383	0.100142640253967
ALDH1L2	0.786747533683977	203:312	1.06051379712784	0.583652644061932	0.105501623748013
COX18	0.731512205006217	428:87	1.0522304530481	0.508548393104337	0.125033316896706
CPOX	1.42375910726976	422:93	2.11421606904277	0.958790364530421	0.0489064112510226
NNT	0.55929581670664	50:465	0.92384688690115	0.338597028382926	0.00406088822849193
DCAKD	0.505133375998804	54:461	0.852538785207761	0.299293981664151	0.000650431803838281
SFXN3	1.39353196442066	298:217	1.88351875413851	1.03101247683106	0.0242976719460613
AASS	0.632987067922934	150:365	0.87213894357636	0.459413756384556	0.00232436905100586
DIABLO	1.72405588347691	161:354	2.33458743096268	1.27318799455956	0.00133334686386177
PXMP2	1.40328783510216	120:395	1.94564656084683	1.01211432115842	0.0587211135588842
GLS2	0.43421518929373	50:465	0.744235020639126	0.253337756736408	1.57839074806931e-05
APOO	1.56910142675815	141:374	2.15836217445084	1.140716473166	0.0124586309098644
ACAD11	0.636714648811556	84:431	0.931376358220663	0.435275751239516	0.0074416162500589
C5orf63	0.775782086304701	381:134	1.07723818430923	0.558685956548412	0.153779524289809
HOGA1	0.603075764232524	218:297	0.812366133365858	0.447704997127011	0.000523071360861049
TTC19	0.583526778030893	461:54	0.905250880341736	0.376142689362063	0.0492669099476923
NGRN	2.60949621418613	76:439	3.85054995485967	1.76844102055024	0.000515086075504434
TCAIM	1.47053570000735	125:390	2.05375323192996	1.05293820668221	0.0408937463495052
GCSH	1.84959912491317	99:416	2.68618623736049	1.27355909850879	0.00824269969771141
SIRT5	1.3810017875361	431:84	2.12868411079224	0.89593656828119	0.0972104170590214
GPT2	2.18621504123059	61:454	3.459913137283	1.38140352571283	0.0135331622032755
FAM162A	1.49622074098985	161:354	2.04764760298473	1.09329188406493	0.0207236436545681
ABCB6	1.50156600937253	397:118	2.10283415480359	1.07221983024787	0.00919141224277342
MACROD1	1.35857681075022	230:285	1.81717848105957	1.01571252903679	0.0426013128043059
TST	1.6389255378164	451:64	2.55076210517319	1.05304877826872	0.00858910647882116
MTFR1L	0.694068389441615	271:244	0.927783413494893	0.519227787665907	0.0131245878473781
SDR39U1	0.563725428113045	413:102	0.800150423165314	0.397158270621299	0.00663626570836384
DMGDH	1.37642098271895	451:64	2.16388583149805	0.875524343332584	0.117757743348303
SLC25A14	0.58502841067256	400:115	0.817132516163304	0.418852798688116	0.00611520515808861
CHCHD5	2.16155922957688	80:435	3.17445929595474	1.47185327243699	0.00245941982264142
TOMM70A	1.64272685018353	100:415	2.33896285049612	1.15373850582599	0.0173702764609716
NIT1	1.9190898781361	56:459	2.92412074335562	1.25949175277149	0.0168117638524238
FAHD1	1.45588261373511	426:89	2.14139524635282	0.989819225846436	0.0314816764634608
MCU	1.67293686931901	86:429	2.4005735357496	1.16585379579008	0.0170790146724514
CYP27A1	0.60704658597384	296:219	0.811931758139137	0.453862721649257	0.00121982582177771
FASTKD1	1.27571545098822	337:178	1.7418672227976	0.934313414128225	0.109554744811709
MRPS31	1.57555089913937	440:75	2.40901259656786	1.03044734565336	0.0135946669334871
ALDH1L1	0.676808967763832	63:452	1.12673650536928	0.406546141589167	0.0773061840984663
PTCD1	1.18502690683414	342:173	1.61158336817575	0.871372091355404	0.264475409688306
HADHB	1.28642710860265	135:380	1.78658940167348	0.926287094392064	0.157396334927792
TRIT1	1.28988706527567	458:57	2.07021860419019	0.803687416294042	0.243164626748474
CRLS1	0.638422965353594	79:436	0.95630713729288	0.426206044895437	0.0112751387401248
GLYCTK	0.738680769058269	107:408	1.05251489485499	0.518424281921153	0.0680225329719354
SLC25A32	1.62714560171055	255:260	2.17571162667254	1.2168904999672	0.000974499132269546
AARS2	0.862124534219669	302:213	1.1586371225304	0.641493957038289	0.332103727782679
EXOG	0.748943311869681	95:420	1.07186916320211	0.523306485204445	0.0856316757810804
CHCHD2	1.94659148926927	364:151	2.69155134602094	1.40781948362136	5.37056773486366e-06
KMO	0.558350231924137	435:80	0.819793243082638	0.380284887830323	0.0146051139227628
SFXN5	1.46783218552538	408:107	2.11588614870149	1.01826429847675	0.0211845872830022
ELAC2	1.31422674236122	262:253	1.75623130064574	0.983464951172612	0.0648825040779291
GPX1	1.29467092144963	322:193	1.74940454595343	0.958139041495235	0.0823147680420194
CPT1B	0.629599605850806	461:54	1.01986681154926	0.388673951538176	0.1172697235664
FIS1	0.772623718507628	60:455	1.24082246222833	0.481090106419033	0.236247141876585
PRELID1	2.19472326900096	463:52	3.72136024360385	1.29436816437571	5.03731715286726e-05
UCP3	0.715364576673293	84:431	1.06437639056951	0.480794653181983	0.0643184653112573
SLC25A27	0.648139852114699	160:355	0.888950849261689	0.472562986185527	0.00371624925844549
SLC25A40	1.66972512329825	117:398	2.30899566889375	1.20744357598085	0.00550285803228134
SLC25A23	0.695476315208451	274:241	0.929313293276196	0.520478194507189	0.015131746726285
HEMK1	0.527488691238043	400:115	0.740915475048254	0.375541244250435	0.00202046252354815
SLC25A36	0.606877197015923	77:438	0.911501468246205	0.404058517828325	0.00432590983857872
OMA1	1.18563557372399	311:204	1.60372911450936	0.87653937373948	0.255254008510579
LETM2	1.92188905347319	448:67	3.03710386433394	1.21617754902502	0.000341305416121873
DHRS1	0.608366082614011	71:444	0.953188159273711	0.388285656797421	0.00886430479369671
STOM	1.61573503058035	54:461	2.47202720603234	1.05605621276092	0.0634068785478985
METTL5	1.8303990737545	277:238	2.4517491481783	1.36651858192373	4.20281672620648e-05
MSRA	0.703755187462087	413:102	0.985719955312003	0.502446319779569	0.0608878708540818
NUDT8	0.772533743761147	440:75	1.1772816544373	0.506937641472776	0.274172252928836
NMNAT3	0.699633034049638	160:355	0.96052919500696	0.509600733510193	0.0180918416088875
SLC25A38	0.725836948945762	457:58	1.09584688460659	0.480759934490325	0.170620532843648
MPV17L2	0.800582412882915	434:81	1.15787665482604	0.553540998642659	0.267119502430683
ACLY	1.45848016623124	179:336	1.96424911167305	1.08294023535441	0.0183133910705614
ABCD2	0.635028730172352	321:194	0.85613561576018	0.471025244973889	0.00531560743170956
FLAD1	1.59579516354899	111:404	2.25037004993893	1.13161931037762	0.0197115320891125
LIPT1	0.644164822421428	58:457	1.0270115774666	0.404034703745804	0.0282150297208286
PCK2	0.687059677912752	197:318	0.931312671831114	0.506866292375734	0.0109690430574736
NADK2	1.41177387255342	461:54	2.2844559460854	0.872463953896691	0.106803481284393
MPST	1.55672527737652	383:132	2.1732217985913	1.11511562731143	0.00409836967407617
NUDT13	0.587905898512272	91:424	0.875611476610818	0.394733685816163	0.00182105357712681
ACACA	0.633585168503047	445:70	0.954014470288263	0.420779954863514	0.062609360413469
ABAT	0.512153535940263	281:234	0.684357067417031	0.383281267724929	1.44560220958212e-05
ALDH5A1	0.632422143482454	386:129	0.875754959617717	0.456700545254726	0.0136321631999755
CKMT1A	1.67592313428705	464:51	2.8366334817626	0.990159063585926	0.0167233328680384
PISD	1.24800484541942	180:335	1.67835633506496	0.928000843235754	0.15091933843039
NDUFB4	1.83955890610965	140:375	2.52696777320697	1.33914528112589	0.00107877227565778
UQCR11	1.84354282248487	67:448	2.76577765042693	1.22882261985553	0.0170260901570394
FAM136A	1.69322495954422	316:199	2.29040806153228	1.25174671351161	0.000299124972774401
TOMM5	1.69535058674849	189:326	2.28411568526651	1.2583485287231	0.00135473495596949
HTRA2	0.732351268808251	448:67	1.09035655995453	0.491892652938614	0.167632104835533
NDUFA1	1.69219583465099	123:392	2.35074348333145	1.21813662916211	0.0060771031304141
GUK1	1.3831142087081	314:201	1.86413785464111	1.02621429502515	0.0275502768567712
D2HGDH	0.767123548029476	53:462	1.23364345695375	0.477024811848367	0.223759932633637
OPA3	2.08976183249594	463:52	3.60452593831829	1.21156140676693	0.000285815802031686
AKR1B10	1.48766452372654	403:112	2.14770472514702	1.03047020814419	0.0169540783863785
PHYH	0.675713678525056	87:428	1.0133692261299	0.450565266412909	0.0301216292858728
NDUFAF2	1.92837471871451	104:411	2.74050820679839	1.3569122130532	0.00267662088618403
ECSIT	1.36372806689254	219:296	1.82453663896238	1.01930221663738	0.0404888132607636
PARL	1.60588719950833	287:228	2.15540587090373	1.19646778936509	0.00120138429059491
MRPL42	1.44366540639837	328:187	1.9624811300423	1.06200756467219	0.0129123136390177
DNAJC4	0.695661212381032	128:387	0.981494968445262	0.493068775663761	0.0233803980564496
PAM16	1.27576775850655	215:300	1.70800508502555	0.952914829068246	0.107332696476641
ALDH3A2	0.787099900449828	235:280	1.05448973764458	0.587512833147117	0.103958729958302
ACSL6	0.733083234302742	132:383	1.01480778930012	0.529569278125468	0.0446433296824731
MRS2	0.763796293554645	321:194	1.02341832470671	0.570035501577521	0.0767537683300934
ABHD10	1.40860352000279	371:144	1.94760607933527	1.01877063211954	0.0259355989088432
HINT3	0.676233902704158	169:346	0.922649970508559	0.495629226449159	0.00865241094630098
PXMP4	0.55623321479476	258:257	0.744806598309016	0.415403663103086	6.38681631142113e-05
OSGEPL1	0.71198516589466	341:174	0.964361878346456	0.525656278868304	0.038103886044706
NUDT2	1.7390384016505	457:58	2.78995262903521	1.0839806134848	0.00438547619806851
CYB5B	1.60786378346119	388:127	2.26539962520884	1.14117876484058	0.00226242230492235
GRSF1	1.63481583119709	382:133	2.28698643474264	1.16862206147427	0.00130728425978255
MRPS18B	1.97041085213481	51:464	3.1786126556907	1.22145078585141	0.0331093235542441
DNAJC30	0.661526123366537	51:464	1.0849056399812	0.403368547244297	0.0523052955303493
CAT	0.586656036911318	93:422	0.863893857686989	0.398388416102379	0.00137965270134977
DGUOK	1.54093528083327	171:344	2.08894652844864	1.13668852092643	0.00992354926035643
ACOT9	1.42855373276014	233:282	1.90975180693884	1.06860261106604	0.0181921475646526
ACSS1	0.537691740072826	185:330	0.733910118532926	0.393934352506918	1.93067887928056e-05
RFK	1.59943322320887	426:89	2.38191488626244	1.07400421831128	0.00688451000689239
STARD7	0.765591723992233	94:421	1.13909430289941	0.514558528081023	0.147935685844284
CHPT1	1.50009219422632	420:95	2.18215576024194	1.03121721747729	0.0164150772549209
TIMMDC1	1.71893453054294	214:301	2.30006925470298	1.284629110298	0.000504441298745162
HTATIP2	2.03463022538052	458:57	3.31535868387034	1.24864925601332	0.000155796910462747
AKR7A2	0.749483522640409	194:321	1.01712688660559	0.552266937494982	0.0536272486104016
DUT	1.78888005289962	306:209	2.41055161846696	1.32753508331728	6.5323365897596e-05
DHRS7B	0.645484486913826	463:52	0.98383123061324	0.423497658827824	0.0802844721049403
MTRF1	0.725596190092002	67:448	1.09884247310967	0.479131307680608	0.0896608753224547
TMEM143	1.48667187619831	163:352	2.0188396614509	1.09478395420991	0.0179186925282685
NT5M	1.37974553106437	317:198	1.86249014307771	1.02212499624094	0.0293969683902686
RHOT1	0.810199965848629	243:272	1.08301625524178	0.606107231986631	0.153591656907439
NME4	2.62539180729611	78:437	3.87095954340595	1.78061332455902	0.000483687097223129
MTHFS	1.8289881383357	417:98	2.67938026821289	1.2484967698907	0.000190143392195585
PNPO	1.25765017450256	242:273	1.68039719212243	0.941256013067108	0.121102211845743
MICU2	1.47074442048615	387:128	2.07447028981834	1.04271878995219	0.0151671069812842
PCBD2	1.64650737086523	66:449	2.42570430682799	1.11760799314348	0.0326956556728532
QRSL1	1.31669907234373	405:110	1.87088101656288	0.926673813974514	0.0976762592544138
ADCK1	0.683282395954894	328:187	0.920121642701827	0.507405554825272	0.0167458077052771
PRDX6	1.55817177586521	352:163	2.12162256894055	1.14435966068901	0.00267069269857467
NIPSNAP1	1.33338841963724	382:133	1.86449016358441	0.95357149763917	0.0713778257209673
SLC25A33	0.602204267266663	221:294	0.813929933203565	0.445554297391197	0.000479479139554262
LYRM9	0.643159854643887	314:201	0.862175596095409	0.479779989713106	0.00484251896046806
RAB24	0.802289522968959	105:410	1.14692424192548	0.561212724552023	0.197537443385184
PARS2	0.732182973650819	180:335	0.999646579335783	0.536281439846834	0.0387093074493007
MRPL52	1.90875105936646	112:403	2.71539329698325	1.34173219425718	0.00310403551302929
PUS1	1.68719890815536	87:428	2.4317651686164	1.17060651761053	0.0173651875294898
GOT2	1.59031996014744	389:126	2.23349316564782	1.13235966625838	0.00281533968147063
ACCS	0.588522157387354	59:456	0.933589967897609	0.370996199237064	0.00577958419027258
PTRH2	1.75487706007396	107:408	2.48249249343328	1.24052479679998	0.00704123770600051
PGS1	0.587052353654951	341:174	0.800325179614522	0.430613049183095	0.00252457942813666
OXR1	0.778180207628581	217:298	1.04277988036556	0.580721249946416	0.0881256519085838
LYPLAL1	1.33598973018564	325:190	1.80428151411921	0.989240617494661	0.0502179013508915
DNAJC28	0.510518547554459	57:458	0.825758799582893	0.315623869256692	0.000360590987523057
FPGS	0.813587505270755	205:310	1.09625176647905	0.603807126221257	0.163532964269876
TMEM205	0.753710478663633	403:112	1.0524573784644	0.539764837295573	0.121932248272575
SLC25A53	0.730495838303979	164:351	0.992609280813767	0.537597401207002	0.035089303496609
AIFM3	0.736603372723369	225:290	0.986442291443067	0.550041835608746	0.0376082627755043
MGST1	1.36851947780326	404:111	1.94662930588448	0.962096663943909	0.0571619586705905
MTFP1	1.60858421994907	380:135	2.24723213459312	1.15143564958751	0.00195128070066664
COA4	1.51892091785529	305:210	2.04043079943473	1.13070276891405	0.00432260476718949
NIF3L1	1.6920600731049	88:427	2.43799084130583	1.1743552282839	0.0163336258047176
PUSL1	0.839460534287005	173:342	1.14962097028849	0.612979413944218	0.257183330180378
SDSL	1.44813174003522	189:326	1.95662055066964	1.07178958934051	0.0229014860723161
BAX	1.74790694613091	462:53	3.05601617081882	0.999725957442855	0.0123542295117055
MAVS	1.31854893461543	165:350	1.77895373853477	0.97729988999458	0.0800658690131153
METTL17	0.698047320660896	339:176	0.944657170086715	0.515816824676328	0.0273801220500716
ACACB	0.708168161952156	130:385	0.988689570522918	0.507239239246198	0.0280790302900517
ARG2	0.566114323708314	443:72	0.839198792436933	0.381894528919745	0.0199642548324477
MTPAP	1.39822637189772	356:159	1.91979594423667	1.01835666073751	0.0274259250904696
CCDC51	1.59906989739902	361:154	2.19187353862641	1.16659309568113	0.00160285582390318
SUGCT	1.3448791519027	307:208	1.81084257402223	0.998816771358018	0.0442118746509254
DNM1L	1.58979628814778	361:154	2.20627988886386	1.14557189709506	0.00215470236582249
TMEM126B	1.51792971497044	220:295	2.03049068088982	1.1347555747365	0.00636180552523891
NSUN4	0.693841626136297	223:292	0.932415408208899	0.516310860932925	0.0127345713693578
ACSS3	0.572725958508012	140:375	0.809443247914128	0.405235357011366	0.000282673909574815
FAM210B	0.552727829204225	98:417	0.820317214036987	0.372426724624409	0.000356697171781217
RBFA	1.32799442723207	146:369	1.83153732145098	0.962890124107496	0.10462000999119
METAP1D	1.63387025976784	348:167	2.24590835302876	1.18862019554529	0.000976370742443389
AHCYL1	0.80675089223846	72:443	1.23794143654458	0.525749427973134	0.28753322081206
NIPSNAP3A	1.28332316102793	368:147	1.78514860562297	0.922566519360432	0.115265646532217
FUNDC1	1.46674775796802	91:424	2.10350477916889	1.02274499530931	0.0623648833275754
ACSL1	0.711984392991285	79:436	1.06495166773012	0.476004490366818	0.0632941762981609
COX20	1.38201495190536	351:164	1.89612541206894	1.0072990505443	0.0333826255192119
HSDL1	0.545499278883202	406:109	0.762687560876242	0.390159061884029	0.00266696033234703
CBR3	1.40540325446339	161:354	1.9349115482614	1.02080030967361	0.0534116174948437
MTERF4	0.730795277501468	363:152	1.00187614691458	0.533061635675394	0.0683514693068193
NUDT19	1.48150712652661	296:219	1.989999887094	1.10294647762734	0.00730545144967365
HEBP1	1.41890244446075	222:293	1.89696664726171	1.0613176303352	0.0204212357191691
PTPMT1	1.22775475239728	175:340	1.67175096887584	0.90167839594419	0.208881334947599
PGAM5	1.58992095321388	414:101	2.30545325949287	1.09646492595759	0.00499982977838276
DTYMK	2.32796014618845	183:332	3.13131408299112	1.73071058942289	1.06104986863365e-06
STAR	0.494686725605865	264:251	0.661373592370253	0.370010171730072	2.94690472235626e-06
DNAJC19	1.35169377470761	303:212	1.81336015218726	1.00756380820407	0.0401156439961162
COX7A2L	1.58651599767567	130:385	2.21537190850238	1.1361672508443	0.0164761324498068
MTERF3	1.68452436678409	231:284	2.25093798559189	1.26063994674788	0.000580892490375629
SFXN2	0.688280464688111	235:280	0.923510470569716	0.51296656959291	0.0105312283673946
FASN	2.14948566474491	59:456	3.25870783326985	1.4178284336426	0.00627054274577032
PINK1	1.2635908939467	201:314	1.69534919752286	0.941789425799687	0.126148004512337
TMEM177	2.15506708686495	58:457	3.30927275010702	1.40342440759481	0.00834835842773995
TXNRD1	1.83968528955089	446:69	2.85237042513453	1.1865366204778	0.000659221574109581
THNSL1	1.44065265704968	58:457	2.22097856861072	0.93448901650707	0.147492011984852
FDPS	1.5861396686636	169:346	2.13584041766165	1.17791527293161	0.00427997657001877
IDI1	1.56100116257711	461:54	2.62934761408338	0.92674114921718	0.0437156852318378
TOP3A	1.33692382795264	223:292	1.78760456241526	0.999866166895768	0.0535647143592811
LDHAL6B	1.80491262797578	462:53	3.18019521748545	1.02437409399108	0.00781496014251959
MTFR1	1.60111768487035	192:323	2.14737770162807	1.19381785461448	0.00271439988207633
BCL2L13	1.89237208180591	448:67	2.96467102099041	1.20791550584999	0.000417135116565159
TRMT10C	1.42632870731213	204:311	1.91487469237952	1.06242648116813	0.0232896400107135
ACOT7	1.90715045983338	337:178	2.62119647306621	1.38761932339545	8.81048346146329e-06
TFB1M	1.3770020751683	236:279	1.84038044449128	1.03029497009349	0.0328144808501443
ARF5	1.40447381973378	203:312	1.8876583815154	1.04497017555372	0.0307198009401525
MMADHC	2.04569042005517	434:81	3.11575490369574	1.34312531763704	1.94010611601625e-05
PYCR2	1.3146654446312	447:68	2.01073045495406	0.859560876023449	0.163460663619788
TSTD1	0.600934875056075	75:440	0.932096410856232	0.387430656155976	0.00589595183885139
LYRM1	0.741846985400548	441:74	1.08547459272159	0.507001226411051	0.161831112959319
OSBPL1A	0.812615379690042	361:154	1.10966877233885	0.595081858451316	0.208823216917298
RECQL4	1.94037853133587	167:348	2.62113231158082	1.43642838182343	0.000116173777906736
PET100	0.718677664479182	73:442	1.08992038883692	0.473885607344603	0.0804204500734897
GDAP1	0.779141356632219	418:97	1.10938565264341	0.547204889632569	0.195322953425586
MTIF3	0.629393052563374	62:453	1.00032504642855	0.396006893988472	0.0189314965262148
UNG	1.75552108762374	170:345	2.36240657734122	1.3045401746892	0.000586504777737473
ISOC2	1.46797065073185	432:83	2.1889540954694	0.984460037727736	0.0321341515210185
QDPR	1.37334013979695	186:329	1.85760039163239	1.01532232016817	0.0500924324851005
GTPBP10	1.48167716992838	284:231	1.98691486628055	1.10491258238791	0.00732077758838479
TSPO	1.35334527968556	323:192	1.83589748314279	0.997628387676561	0.042552201771722
FTH1	1.31501083781179	184:331	1.77436114271211	0.9745780957079	0.08503606730668
TRMT1	1.31952032675105	178:337	1.77699039756692	0.97982177905586	0.0766037861447619
ADCK2	1.50464251546946	61:454	2.28157574028772	0.992274356437879	0.0948572233872041
TSTD3	1.36301083436467	360:155	1.87706359954078	0.989736594460612	0.0435796547643518
MRPS36	1.69271070737138	62:453	2.63134746685019	1.08889820707698	0.0553380554449251
PDP2	0.688345318267213	300:215	0.922163107865097	0.513812874467871	0.0155579657577197
AGPAT5	2.03782310657708	454:61	3.32158507334964	1.2502232885794	0.000149946442889237
UCP2	0.567992108163547	83:432	0.869863368067443	0.37088012529234	0.00142671577736186
SLC25A37	1.24524688503466	195:320	1.67135254433746	0.927775417545557	0.152129247487978
SLC25A28	0.764942035916853	441:74	1.13777286963321	0.514282185776899	0.225020745994932
SLC25A43	1.51315365806764	186:329	2.0354242514398	1.12489275457137	0.00947309124459084
SLC25A41	0.787522134286414	160:355	1.0828789442375	0.572724324626821	0.123248451959489
SLC25A34	0.648004523999208	102:413	0.942583794229008	0.445488099513644	0.0096170350558894
EPHX2	0.62062831966412	343:172	0.836039929518588	0.460719036937511	0.00333531807190146
NUDT5	1.53959264495721	461:54	2.45091618552348	0.967126304198799	0.0314243953820466
MICU1	1.46912109223807	101:414	2.12766253569833	1.0144074764894	0.0718582901012366
SOD1	1.57712323750821	276:239	2.10863699020923	1.17958554167332	0.00210743898482857
SERHL2	0.764282388774186	152:363	1.04656183824555	0.558139565617645	0.0782259204148734
NDUFAF3	1.23391848303142	198:317	1.66923328911659	0.912128240368568	0.184152166191055
BOLA3	2.0629949273723	87:428	2.95951759693419	1.43805465957446	0.00173679868352505
OCIAD2	1.60557058131087	144:371	2.19629057218195	1.17373216650923	0.00734071782962487
RSAD1	0.580458710959901	64:451	0.936507021678318	0.359775535398989	0.00557826572846876
CHCHD6	0.725851195712499	338:177	0.979583955517969	0.537840534595811	0.0451042797110858
FASTKD2	1.84933380189175	447:68	2.92062151458401	1.170995794471	0.000841687660100399
PEX11B	0.77173617100246	227:288	1.03343766898398	0.576306375805982	0.0776359179559568
TMEM186	1.23125357294336	367:148	1.69506221698031	0.894353815275561	0.182588552902779
PIF1	1.70615618831255	102:413	2.38342390798154	1.22133915379846	0.00644142197303077
ABCD1	1.49067260434896	282:233	2.00265798448756	1.10957778640626	0.00628953651857789
DBI	1.35841275529072	118:397	1.89318442024648	0.974699133376702	0.0934511035966945
PNPT1	1.58533167123407	207:308	2.1207809710069	1.18507122714543	0.00267591816042145
TOP1MT	0.722629156350201	340:175	0.974134150290828	0.536058506368453	0.0409537759575255
RNASEH1	1.68933039855235	311:204	2.28283261294297	1.25012985152421	0.00031998125440813
ABCA9	0.659919452063374	321:194	0.891968965935261	0.488238604529243	0.0114331467651453
SCP2	1.78672560252621	458:57	2.90298217057837	1.09969272669925	0.00311065668301269
NT5DC3	1.61412381012614	240:275	2.15682686762926	1.20797626991726	0.00135713694453776
LDHB	1.71369828244873	345:170	2.36324667733139	1.24268102498041	0.000279860655290398
YBEY	1.70455855406519	457:58	2.72449372922425	1.06644395363102	0.00602358459672347
HINT1	1.77003548828159	111:404	2.49168009282684	1.25739481516738	0.00543210864409283
MUL1	1.9149045070298	463:52	3.15441684421698	1.16245234924025	0.000911167407483093
TK2	0.661979102394735	51:464	1.06668615055867	0.41082030715204	0.0460224227343097
AGMAT	1.67786424493437	322:193	2.27778818088557	1.23594829758695	0.000403397801509886
CMPK2	1.58491186922014	454:61	2.51785386660935	0.997653464526747	0.0197963414034877
BID	1.86823535100946	130:385	2.56991653015737	1.35813879003599	0.000831813047717955
ARL2	1.3697992597537	392:123	1.92417605339319	0.975144664498311	0.0496866603023839
SYNJ2BP	1.25984068676917	138:377	1.72975877184242	0.917583759004987	0.173445700154207
MFF	1.76644467165027	300:215	2.37585352783721	1.31334980942285	9.7376308444197e-05
DCXR	0.735745389778214	444:71	1.08180133198469	0.500388807607383	0.157525699315648
NUDT9	1.62789277652263	120:395	2.30027881254126	1.15204942870682	0.0162387962480847
AMACR	0.633151325784172	452:63	0.972164504671576	0.412358813159593	0.0776773177017486
VPS13D	0.572842537778268	343:172	0.777441653397512	0.422087717649547	0.00127270930226031
NUDT6	1.33860737996038	298:217	1.79960846782514	0.995699758986972	0.0477756731416961
BAK1	2.14072134164652	420:95	3.21424890427957	1.42574144039664	2.3014433953028e-06
DHODH	0.69291345110709	369:146	0.950393842476141	0.505189563806745	0.0345751920903224
MAOB	0.57965482513336	354:161	0.784902710895771	0.428078170244726	0.00135895897497107
MGST3	1.49120136186347	324:191	2.01049669766565	1.10603588864649	0.00648814651713758
ACP6	1.34133059658934	335:180	1.83183818815709	0.982165226698746	0.0522832153232522
MRPL48	1.56405203296367	75:440	2.3380490123956	1.0462820705847	0.0623168888808322
CYB5R3	0.790588983217418	123:392	1.12517467096679	0.555496809973249	0.162376911187977
DDX28	0.788416992645215	166:349	1.08762745840161	0.571520468235732	0.125990660121814
PNKD	0.666468684499705	52:463	1.13854177031017	0.390131059748263	0.0769847006534834
MICU3	0.612503426961156	210:305	0.824042578421026	0.455268280867255	0.000809261330190214
BNIP3	1.47085251774539	178:337	1.99056761608248	1.08682925989503	0.0191292486045443
MTX3	1.37479142853451	150:365	1.8663679470512	1.01268963333739	0.0524313265657401
MUTYH	0.768710043385294	91:424	1.12366050463066	0.52588404448339	0.139614331256523
GTPBP6	0.763032700355763	416:99	1.08417726060449	0.537014492895366	0.160945470827589
CYP11A1	1.14340200439703	144:371	1.56828758614264	0.833627808579896	0.417523384235791
OCIAD1	1.49229610957683	273:242	1.99654952961294	1.11539816349553	0.00666227393410812
METTL8	1.74491512162679	241:274	2.33166678501017	1.30581642336538	0.000208947370906931
SMIM20	1.5500065625749	234:281	2.07348123181601	1.15868921655059	0.00432101253135664
RPUSD4	1.45004585584327	297:218	1.95027550197545	1.07812100491365	0.0114023173923339
SMIM8	0.807547633799228	278:237	1.07925258059998	0.604245190215062	0.151130043160901
NME6	0.698861214404339	450:65	1.05816284436917	0.461561280097558	0.136691709957886
FKBP8	0.839337846670737	344:171	1.1385612027822	0.618752877871103	0.273246968031956
NLRX1	1.73315081925386	222:293	2.31587662554373	1.297051720782	0.000298869071230112
FOXRED1	1.30975108041619	447:68	2.027645853148	0.846029344812887	0.177533794290697
TFB2M	1.68451919033411	63:452	2.56083363860605	1.10807858028157	0.0418540439384509
PPM1K	0.517485365197881	76:439	0.792261907841167	0.338008303243668	0.000129817829526702
TAZ	0.723501691396933	165:350	0.985933523049958	0.530922912363229	0.0309042716187012
MSRB3	0.80835295318602	245:270	1.08014788558999	0.604949105249271	0.149728827557938
ACOT11	1.76433476617625	344:171	2.44212572626078	1.27465884891374	0.000123519833058694
NIPSNAP3B	0.473189955509342	75:440	0.727728118662187	0.307681850203279	9.39929055909783e-06
NTHL1	0.817678387448382	241:274	1.09662655800345	0.609686078109811	0.172397553601181
SFXN4	1.35583598210574	353:162	1.85534195970106	0.990809915531064	0.0446153345553482
TRMT5	1.51563987998049	413:102	2.23202101995376	1.02918575822143	0.0159512423419818
SLC25A6	1.36669955235019	313:202	1.83855197644314	1.01594498840755	0.0336343123439882
OGG1	0.798010550287793	393:122	1.11652285605343	0.570360772211681	0.214157830405197
QTRT1	0.727654730265494	407:108	1.03297697706206	0.512578129266417	0.103091620324027
AIFM2	1.4537352913394	396:119	2.07480734384491	1.01857471420423	0.0220978480425942
PRDX2	1.40685693816603	214:301	1.88337458256018	1.05090429848288	0.0254465626858902
FBXL4	1.21198486305096	266:249	1.6223330179783	0.905428966794474	0.189906487605886
GPAM	0.59472720610259	61:454	0.970314946491259	0.364521283483886	0.0103260608590623
RMDN3	0.723453704612257	423:92	1.04431687773638	0.501174762062323	0.117107281841208
PET117	1.29501111231715	446:69	1.9645943910388	0.853638689326679	0.182287165573058
MAOA	0.656435231577645	187:328	0.891750110263681	0.483215206027821	0.00433308433198876
C15orf61	0.76030889684497	381:134	1.04708537187009	0.552074963657629	0.113635945279805
POLQ	1.76091290364512	167:348	2.37163506319019	1.30745842914502	0.000608189389356029
BCO2	1.34432870771802	97:418	1.89857285953878	0.951883234459502	0.120573345125116
IFI27	1.30814303614341	389:126	1.82245747027931	0.938972914823759	0.0908881117622677
CRYZ	1.46826137028598	175:340	1.98272037015925	1.08728970757531	0.0180807025512041
PYCR1	1.81071567933548	79:436	2.67541578247488	1.22548849897208	0.0149666010648677
TMLHE	0.769662323490085	78:437	1.14982559029036	0.515191257876393	0.161503162204172
TOMM20	1.37919747058609	154:361	1.89346351071389	1.0046064537858	0.0629639799509056
YRDC	1.6242693948362	78:437	2.36517247690074	1.115458214049	0.0305521583790652
COA7	1.65233872393155	356:159	2.28380942452315	1.19546895169408	0.000802020500151435
DHRS2	1.32748913458933	140:375	1.8234211699745	0.966440135428164	0.0995090548294388
MMAA	1.32237045360972	389:126	1.8649788419943	0.937631879356899	0.0868413160135498
MIEF1	1.94710887114004	380:135	2.76812026189406	1.36960557973667	1.03079351866375e-05
C15orf48	1.57140975372026	306:209	2.11930769022146	1.16515814361487	0.00190071114164347
LIG3	1.28842611771874	258:257	1.7245321516614	0.962604181789544	0.083975491042424
BNIP3L	0.771886535613945	353:162	1.04552619016426	0.569865039696894	0.108036711543309
FASTKD5	1.56090843889417	89:426	2.25710338413486	1.0794521738511	0.0400910253131435
PARK7	1.98808156078488	64:451	3.09312152781946	1.27782508924543	0.0187769533241576
COA1	1.46336635652948	130:385	2.00540007596522	1.06783734531958	0.0282780929055146
SIRT4	0.552737769990278	75:440	0.875064781611143	0.349138770973405	0.00146730923402971
UQCC2	2.00105794272956	78:437	2.96836194086884	1.34897056690769	0.00673229812528253
USP30	0.792067893063251	412:103	1.13902999560366	0.550794579285124	0.240446036535864
PDE12	0.680056855410634	398:117	0.955847256200261	0.483840198934574	0.0458971908102905
NME3	1.39513625532435	451:64	2.16794214498636	0.897812321893252	0.0934269290211742
DHX30	2.24107699424659	54:461	3.47123526131151	1.44686998029738	0.00747740236270378
FASTK	1.64611792819645	71:444	2.42520435217233	1.11730965314433	0.0328798587324307
METTL15	1.47026474537765	304:211	1.97833560628892	1.09267528453143	0.00863117053627116
CYP24A1	1.91105058660349	421:94	2.85756750173857	1.27805006962584	9.49601560440438e-05
PANK2	1.4950626316056	50:465	2.31594893153074	0.965138843085832	0.119835799694849
CA5A	0.624422385264988	120:395	0.895233231327895	0.435532665204659	0.00344833136447498
NT5DC2	0.694349223980286	120:395	0.995767661511044	0.484170016236943	0.0267609002489293
ATAD3B	0.693050263911782	457:58	1.05761107166678	0.454154349529657	0.135898611305189
TRUB2	1.7497233069204	137:378	2.42447318958733	1.26276160278001	0.00353391963674166
PRKACA	0.802100840016758	288:227	1.07345584279953	0.599340682591762	0.141177133046184
COMTD1	1.40697976006847	270:245	1.88109900740099	1.05235930562603	0.020909525109038
CPT1C	1.61031137184459	71:444	2.39754540846247	1.08156563172455	0.0461561039485254
C3orf33	2.17050738370633	436:79	3.35241020025134	1.40528814235516	3.77635090442752e-06
SND1	1.56648702402283	168:347	2.11683677670782	1.15922097699392	0.00649483941024009
GLUD2	1.35482504802665	296:219	1.82469066537705	1.00595182821365	0.0394642855179738
HPDL	1.47287284139925	445:70	2.26617052756321	0.957277654327357	0.0423633551960685
ANGEL2	1.28785756764233	459:56	2.08558306532846	0.795258238382563	0.25480890345549
UQCC3	1.43807085691076	338:177	1.95449209186865	1.05809985013489	0.0146069131445163
PRDX4	2.08912783808184	122:393	2.90030076032749	1.50482845901668	0.00028340307999708
CDK5RAP1	1.46855513059767	70:445	2.19700842304554	0.981632181735167	0.101964004018697
PAICS	1.75141030262956	226:289	2.34219566752721	1.30964209808971	0.000304191594476699
MGARP	0.6623339548097	428:87	0.942807131827994	0.46529799455727	0.0426265068021114
HDHD3	1.39373005041644	133:382	1.92416425029309	1.00952060258781	0.0616135608634496
AGPAT4	1.31280971147186	395:120	1.88123591123337	0.916136741938385	0.106796675191515
FAM185A	1.23578884032566	334:181	1.67463173894568	0.91194620426514	0.159677016357844
PMAIP1	1.69059217521877	255:260	2.26157600463795	1.26376557632803	0.000376578901357116
TDRKH	0.588087975709518	436:79	0.876268944481878	0.394681871760972	0.0303292452415547
SLC8B1	1.51658061744839	367:148	2.13033180845226	1.07965189276836	0.00769838617446206
CYP27B1	1.25999553544526	205:310	1.68880437822981	0.940066694406655	0.128359264432486
POLG2	0.821414951398981	162:353	1.11351203750852	0.605940932521463	0.191745851297168
THEM5	1.50356359901379	320:195	2.03906935968318	1.10869377029458	0.00572500255175556
BIK	1.8547846287047	415:100	2.72193165980951	1.26389140097661	0.000137626164462556
MTERF1	1.47116941981179	272:243	1.96989763925753	1.09870656152728	0.00851590773379152
MTFR2	2.05483783439962	135:380	2.80975950022647	1.50274730820905	0.00011729782664649
GPX4	0.730177379091997	148:367	1.01487519688951	0.525344403500781	0.0444524881686379
TOMM20L	1.1729861089466	332:183	1.59076040640168	0.864930008469332	0.292869330443276
COMT	1.51203488381777	345:170	2.06562629829642	1.106806924257	0.00548919810969595
SPATA20	0.776579131758335	152:363	1.07839869848189	0.559232080613139	0.108270960858864
OXCT2	0.608314049223128	76:439	0.936349129215117	0.395200861448362	0.00685094596818814
CCDC127	1.54714619855893	56:459	2.47803977213378	0.965949532623618	0.125879452614408
CRY1	1.26126521258411	175:340	1.69828300415324	0.93670485577756	0.133414743434597
MYO19	1.90721120567787	150:365	2.57814434017606	1.41088089071647	0.000169659320667814
MGME1	1.43833097461208	342:173	1.97549046155571	1.04723157756952	0.0162689447023567
EFHD1	0.709323567541051	79:436	1.09701157846451	0.458645955381266	0.0787287059228705
APEX1	1.7511635355576	97:418	2.50071531359607	1.22627862179835	0.00923137980534106
SPTLC2	0.610038363093433	461:54	0.982243932925323	0.378874118710396	0.0929327202862569
NEU4	1.57631735565072	102:413	2.22544202100731	1.1165316293439	0.0228392669711268
CASP9	1.97688366651509	446:69	3.12069270747548	1.25230818836233	0.000155119188297914
AGK	1.22430862107767	174:341	1.64881449006156	0.909096571312362	0.192722392761933
MCL1	2.06191940206455	458:57	3.58204499812624	1.1868950900489	0.000443323002423668
DUS2	1.52673627460556	462:53	2.46508888383332	0.945573876659483	0.0397733086978933
PLD6	0.661190997120296	50:465	1.11834759427399	0.390910247324972	0.0655883152356641
TOMM34	1.37590641863916	342:173	1.87225762850969	1.01114208003487	0.032799861784776
CKMT1B	1.30909167379631	273:242	1.74980192104746	0.97938000283881	0.0678905504753988
NDUFB1	1.45220321565328	287:228	1.94563356966509	1.08391128341641	0.0112013890928211
CASP8	1.44141430498629	351:164	1.98304101933164	1.04772174572534	0.0156570044288905
BCL2L1	2.05829291198243	460:55	3.47190244034815	1.22024445799009	0.000254319658596902
EXD2	2.01196097120221	65:450	3.0439263963433	1.32985704072997	0.0102125207517888
ARMC10	1.40827808250605	247:268	1.88176511597172	1.053929175769	0.0222188938738843
MIEF2	0.684770513100823	289:226	0.914967711498417	0.512488746564011	0.0112534555610557
THG1L	1.69039201459271	358:157	2.33637411215105	1.22301695954336	0.000442466004365372
GOLPH3	0.56951084198311	458:57	0.869624793510909	0.372968435992784	0.0336294212538767
PREPL	0.732193527613264	159:356	1.00531666130941	0.53327213455359	0.0411401085553759
FASTKD3	0.710360809263235	187:328	0.967794950103765	0.521404331860808	0.0219985160119316
CEP89	1.32367046593561	269:246	1.77185292991541	0.988853799775496	0.0564438840341337
GPAT2	1.41647175154404	100:415	2.02968298810595	0.988524924670403	0.0873888091849834
NBR1	1.38803920802562	126:389	1.91686396919469	1.00510671282836	0.0652159366455238
BOK	0.774480652842427	230:285	1.03631382789563	0.578801773633807	0.0827586226464136
FKBP10	1.6267349150419	223:292	2.17491957181385	1.21671923785642	0.00142622610651877
SETD9	1.41519016619365	460:55	2.25292116391485	0.888962844581327	0.09336726526811
RPIA	0.683897788628891	389:126	0.941066338850519	0.49700660408573	0.0316005339331846
BBC3	0.767380506204124	122:393	1.0835063606285	0.543488125866208	0.105956013167803
BAD	1.45966189555793	455:60	2.30163686706178	0.925694613183555	0.0597335677731116
BCL2	0.625061823727192	258:257	0.835163206742547	0.46781548843016	0.00172460757517445
BCL2A1	0.766158036212651	445:70	1.15657331398055	0.507532146347876	0.248420009075395
BCL2L2	0.581607274203487	462:53	0.928181088962706	0.364440759921582	0.0652775469428315
CASP3	1.47189002276461	118:397	2.06184775148735	1.05073725135679	0.042495178924722
DMPK	1.46117039703242	407:108	2.17742529877462	0.980524535268967	0.0334723551714198
DNA2	1.79363745654598	125:390	2.4470982029622	1.31467356791419	0.00103919270071995
ALKBH1	1.24145472858938	77:438	1.83564948687186	0.839599201350422	0.313729513783861
PICK1	0.692838492765045	74:441	1.05657726057136	0.454320942698839	0.0512920846900625
BCL2L10	1.84222882815549	400:115	2.67509111110122	1.26866970668901	0.000116192797722015
AKAP10	1.28738820015257	415:100	1.91170566788731	0.86695792439831	0.169974822046058
STYXL1	1.30373893291746	301:214	1.75249905611104	0.969892222924583	0.0723433876759975
NSUN2	1.56197785401526	232:283	2.08708645657571	1.1689859846233	0.00281263370407892
ADCY10	1.36456257831359	193:322	1.83059644530702	1.01717177202403	0.0440412773708924
SPHK2	0.711562174862283	191:324	0.959587737761363	0.527644017081696	0.0208345908818831
NSUN3	0.801205722606605	100:415	1.16099930670826	0.552912138903524	0.210001825493807
PABPC5	0.77589562639551	346:169	1.05249248216664	0.571988905631314	0.117938248610361
PRSS35	0.67273548466656	139:376	0.937474333014322	0.482757784817813	0.0104487721481595
PRIMPOL	1.5376067227099	319:196	2.08109471798978	1.13605325758859	0.00337614562090505
SERAC1	0.758717940339582	285:230	1.01492486649993	0.567187712109502	0.0669332809714021
STX17	1.36120093888058	77:438	1.9589153031479	0.945864271432201	0.129008358400166
TRMT61B	0.782774348509314	411:104	1.09983220068825	0.557117422367473	0.185024870279602
PDE2A	1.20200259381344	204:311	1.60963074314993	0.897603529059626	0.222163752355418
PLGRKT	1.38379498716779	156:359	1.8861430146505	1.01524038826161	0.0531035065675377
BCL2L11	1.43723321098528	79:436	2.11135223799567	0.978348977298065	0.101034665641306
SPIRE1	1.45617895948397	463:52	2.41686295387319	0.877359288678586	0.0894789494472026
C2orf69	1.74966413068207	457:58	2.92980286323803	1.04489097495524	0.00705775604402892
ARMCX2	0.725359932953343	149:366	1.01070758669985	0.520572952313584	0.0412504830037904
ARMCX1	0.580592462139064	59:456	0.9440049963287	0.357082439609596	0.00649569789001958
POLB	1.45951846793276	278:237	1.95563231713056	1.0892610740665	0.00996028934186
SNAP29	1.55029844549807	402:113	2.2212912724481	1.08199464875441	0.00696818447462
ARMCX3	0.680805706106242	237:278	0.910933306260195	0.508814867434902	0.0090732241503092
ARMCX6	0.656167949922889	269:246	0.876722769803501	0.491097520602216	0.00488637560570393
METTL4	1.38937082353867	430:85	2.06550349566529	0.934566941838438	0.0692588998417137
NAT8L	1.394399398928	255:260	1.86351346065663	1.04337839504828	0.0243753678845252
PIGBOS1	1.37318279982119	86:429	1.99380764646525	0.945743690504815	0.131573435800322

## Sheet: GSE4573
Gene.symbol	HR	low95	up95	p.val
YRDC	1.70228	1.02976	2.81401	0.0592838
YME1L1	0.711803	0.439286	1.15338	0.15752
YARS2	0.647817	0.395485	1.06115	0.103249
XPNPEP3	2.17087	1.31996	3.57032	0.00796209
WARS2	0.620526	0.381125	1.0103	0.0682753
VWA8	1.73239	1.03026	2.91303	0.0235103
VPS13D	0.73579	0.43435	1.24643	0.224853
VDAC3	2.55025	1.57787	4.12186	0.00051009
VDAC2	2.14216	1.28129	3.58143	0.0140786
VDAC1	1.89255	1.09854	3.26047	0.00890656
UQCRQ	0.670425	0.404188	1.11203	0.0970785
UQCRFS1	1.39541	0.862626	2.25724	0.183274
UQCRC2	2.09792	1.27247	3.45883	0.00190004
UQCRC1	1.32875	0.780586	2.26186	0.266424
UQCRB	1.4131	0.870564	2.29374	0.174809
UQCR11	1.21368	0.722645	2.03836	0.474828
UQCR10	1.56514	0.965401	2.53747	0.0816056
UQCC1	0.662643	0.389393	1.12764	0.0999879
UNG	0.627331	0.379913	1.03588	0.093049
UCP3	0.736113	0.445529	1.21622	0.253705
UCP2	0.619309	0.38264	1.00236	0.0490512
UCP1	1.59512	0.95614	2.66113	0.0548349
TXNRD2	0.60601	0.355029	1.03441	0.0420812
TXNRD1	1.68284	1.01932	2.77829	0.0302889
TXN2	1.62469	1.00587	2.62423	0.0537961
TWNK	1.8473	1.141	2.99079	0.0115078
TUFM	1.49932	0.925154	2.42983	0.0947468
TTC19	1.74227	1.06644	2.84641	0.036427
TST	1.26991	0.75944	2.12351	0.38381
TSPO	1.6649	0.958456	2.89203	0.0416195
TSFM	1.47678	0.914579	2.38456	0.114928
TRMU	1.76392	1.08128	2.87754	0.0183794
TRMT61B	0.669804	0.394087	1.13842	0.108766
TRMT5	1.30828	0.757234	2.26033	0.300749
TRMT2B	1.21462	0.751195	1.96393	0.421944
TRMT1	1.31294	0.777941	2.21585	0.281034
TRIT1	1.46634	0.880751	2.44127	0.116206
TRIAP1	1.5186	0.940692	2.45156	0.0903688
TRAP1	1.58679	0.951594	2.64599	0.0574246
TOP3A	0.644195	0.382598	1.08466	0.0741893
TOMM70	1.64558	1.00819	2.68593	0.0614921
TOMM40	1.26699	0.753485	2.13046	0.350389
TOMM34	1.62687	0.991847	2.66848	0.0727644
TOMM22	1.42491	0.848264	2.39354	0.15367
TOMM20	0.713439	0.441585	1.15266	0.173289
TMLHE	0.52971	0.325509	0.86201	0.018636
TMEM70	0.684113	0.418079	1.11943	0.151064
TMEM186	1.43003	0.884695	2.31151	0.141793
TMEM177	1.30611	0.788098	2.16461	0.321724
TMEM143	0.877482	0.523074	1.47202	0.627741
TMEM126B	1.68939	0.97059	2.94051	0.0366548
TMEM11	1.31598	0.803786	2.15456	0.259543
TK2	1.8387	1.12853	2.99577	0.0229864
TIMM9	1.43578	0.889369	2.31789	0.139504
TIMM8B	1.77132	1.09639	2.86175	0.0204944
TIMM8A	1.43284	0.887553	2.31313	0.142229
TIMM50	1.49814	0.924449	2.42786	0.095303
TIMM44	0.799464	0.495078	1.29099	0.358878
TIMM22	1.50351	0.926097	2.44093	0.112286
TIMM17B	1.29004	0.782762	2.12607	0.300125
TIMM17A	1.2092	0.742134	1.9702	0.452065
TIMM13	1.30297	0.796296	2.13203	0.277488
TIMM10B	1.3978	0.86589	2.25645	0.169891
TIMM10	1.3966	0.837903	2.32782	0.176835
THNSL1	0.820752	0.507884	1.32635	0.420642
THG1L	0.60641	0.362376	1.01478	0.0386402
TFB2M	1.69675	1.05108	2.73907	0.0331066
TFB1M	1.45554	0.90164	2.3497	0.128563
TFAM	1.40649	0.827084	2.3918	0.176143
TEFM	2.10415	1.24164	3.56581	0.00176062
TDRKH	1.50484	0.928454	2.43905	0.0837313
TBRG4	1.19394	0.726808	1.9613	0.493225
TAZ	0.858446	0.523963	1.40645	0.551595
TACO1	1.3817	0.837921	2.27836	0.185156
SURF1	0.576245	0.344659	0.96344	0.0225517
SUPV3L1	1.21533	0.710045	2.08018	0.456799
SUOX	0.717678	0.442897	1.16294	0.188355
SUGCT	0.638988	0.364178	1.12117	0.0796594
SUCLG2	0.746262	0.449329	1.23942	0.234741
SUCLG1	1.85389	1.12159	3.06431	0.0311865
SUCLA2	1.21832	0.739211	2.00796	0.448458
STYXL1	1.94188	1.19766	3.14855	0.00567794
STX17	0.690889	0.407906	1.17019	0.138401
STOML2	0.714225	0.41343	1.23387	0.187502
STOM	0.606624	0.362516	1.01511	0.0386677
STARD7	0.67423	0.412378	1.10235	0.135124
STAR	0.508984	0.293992	0.881197	0.0055488
SSBP1	1.3291	0.804706	2.19522	0.24637
SQOR	1.17173	0.718024	1.91212	0.528874
SPTLC2	0.738545	0.436155	1.25058	0.229555
SPR	1.42157	0.834924	2.42042	0.163952
SPHK2	0.693023	0.414552	1.15855	0.135996
SPATA20	1.63191	0.999379	2.66479	0.0655533
SOD1	0.805002	0.489097	1.32495	0.406538
SND1	1.54502	0.952584	2.50592	0.0903034
SNAP29	1.41918	0.858954	2.3448	0.152437
SMIM8	1.27587	0.786824	2.06888	0.315188
SLIRP	1.46234	0.889711	2.40354	0.15646
SLC8B1	1.33072	0.821658	2.15517	0.250804
SLC30A9	0.662036	0.405323	1.08134	0.117386
SLC25A6	0.741753	0.458879	1.199	0.214579
SLC25A5	1.30262	0.780823	2.17312	0.331701
SLC25A46	0.618614	0.380004	1.00705	0.0679795
SLC25A44	0.732367	0.449248	1.19391	0.227709
SLC25A42	1.24965	0.762893	2.04699	0.388646
SLC25A40	1.38447	0.831267	2.30582	0.18658
SLC25A4	2.40938	1.40939	4.11886	0.000166608
SLC25A38	0.703602	0.430985	1.14866	0.176874
SLC25A37	1.52263	0.906087	2.55869	0.0870624
SLC25A36	1.39529	0.841323	2.31403	0.219715
SLC25A32	0.78004	0.472623	1.28742	0.348791
SLC25A31	0.647204	0.394331	1.06224	0.0706954
SLC25A3	1.59386	0.922957	2.75245	0.0639538
SLC25A28	0.624452	0.374173	1.04214	0.0529931
SLC25A24	1.39824	0.809514	2.41511	0.192599
SLC25A23	1.1928	0.737953	1.928	0.468558
SLC25A22	0.835314	0.517197	1.3491	0.45837
SLC25A21	1.26126	0.755077	2.10678	0.34741
SLC25A20	0.687467	0.425815	1.1099	0.125933
SLC25A16	1.19054	0.73566	1.92669	0.471235
SLC25A15	1.42028	0.875151	2.30498	0.168984
SLC25A14	1.46031	0.900091	2.3692	0.117884
SLC25A13	1.66804	0.968285	2.87348	0.0383731
SLC25A12	1.37448	0.79754	2.36876	0.215839
SLC25A11	0.714774	0.43799	1.16647	0.160793
SLC25A10	1.30339	0.807404	2.10405	0.280011
SLC25A1	1.8265	1.11052	3.00411	0.0322254
SIRT5	2.03287	1.24407	3.3218	0.0107118
SIRT4	1.24432	0.747783	2.07056	0.416136
SIRT3	1.81368	1.10219	2.98444	0.0339977
SHMT2	1.25484	0.76847	2.04902	0.350386
SFXN3	1.27896	0.765355	2.13723	0.369403
SFXN1	0.773004	0.470887	1.26896	0.291777
SERHL2	1.50416	0.921091	2.45632	0.0901924
SDR39U1	1.746	1.05127	2.89985	0.052809
SDHD	1.8014	1.10915	2.92571	0.0150663
SDHC	1.50971	0.930054	2.45062	0.107024
SDHB	0.734118	0.451626	1.19331	0.226242
SDHAF3	1.56462	0.944259	2.59254	0.0652699
SDHAF1	0.725171	0.449081	1.171	0.190352
SDHA	1.20633	0.735267	1.9792	0.446333
SCP2	0.773758	0.479312	1.24908	0.295692
SCO2	0.746703	0.453826	1.22859	0.225003
SARS2	1.50449	0.907015	2.49553	0.140356
SARDH	1.25703	0.74306	2.1265	0.366052
SAMM50	0.688946	0.426102	1.11393	0.125369
RSAD1	0.794358	0.482816	1.30693	0.350262
RPIA	1.40938	0.839929	2.36489	0.160499
RNASEH1	0.81959	0.491689	1.36616	0.460642
RMND1	1.25215	0.752893	2.08246	0.404499
RMDN3	0.765501	0.466023	1.25743	0.271483
RMDN1	1.64281	1.00987	2.67246	0.0589863
RIDA	1.65513	0.973752	2.81331	0.0954706
RHOT2	1.39817	0.847177	2.30751	0.170647
RHOT1	1.31252	0.810099	2.12654	0.271442
RFK	1.36238	0.833335	2.22728	0.203668
REXO2	0.794603	0.489773	1.28916	0.360003
RECQL4	1.559	0.952307	2.5522	0.0969935
RCC1L	0.739418	0.447091	1.22288	0.219831
RBFA	1.44864	0.882889	2.37693	0.125943
RARS2	1.26219	0.781428	2.03872	0.34288
QTRT1	0.745594	0.457817	1.21426	0.225262
QRSL1	1.2647	0.776521	2.05978	0.334246
QDPR	1.64947	1.00827	2.69842	0.0355481
PYCR1	1.37228	0.809216	2.32714	0.204713
PXMP4	1.8616	1.09872	3.15418	0.00991525
PXMP2	1.51997	0.930251	2.48352	0.0795132
PUS1	1.48282	0.898333	2.44759	0.147156
PTRH2	1.63325	0.982177	2.7159	0.042755
PTGES2	1.41163	0.841137	2.36904	0.164917
PTCD3	1.36414	0.843728	2.20554	0.197916
PTCD2	0.797212	0.467822	1.35853	0.380539
PRODH2	1.72107	1.04939	2.82269	0.0207773
PRKN	1.47144	0.902883	2.39802	0.134225
PRKACA	2.08979	1.28076	3.40984	0.00819451
PREPL	1.52118	0.930956	2.48562	0.0732143
PRELID3B	0.725194	0.427406	1.23046	0.202741
PRELID3A	1.91507	1.18335	3.09925	0.011449
PRDX6	1.46611	0.870275	2.4699	0.123756
PRDX4	0.609326	0.369749	1.00414	0.0398408
PRDX3	1.3426	0.803834	2.24248	0.227561
PRDX2	1.468	0.886176	2.43184	0.114233
PPOX	1.63794	1.00674	2.66487	0.0601426
PPIF	1.49719	0.919716	2.43726	0.0958067
PPA2	0.790449	0.488235	1.27973	0.344663
POLRMT	1.19484	0.738119	1.93418	0.472432
POLQ	1.23677	0.763446	2.00355	0.376478
POLG2	1.57528	0.958591	2.5887	0.0586743
POLG	0.691247	0.426968	1.11911	0.125518
POLDIP2	1.76139	1.0798	2.87319	0.0185199
POLB	1.53745	0.914016	2.58613	0.0801127
PNPO	0.807044	0.494302	1.31766	0.400549
PMPCB	1.93591	1.18467	3.16355	0.00586872
PMPCA	0.715202	0.433793	1.17917	0.209822
PMAIP1	0.633775	0.392603	1.0231	0.0645293
PLPBP	0.726948	0.442611	1.19395	0.223843
PLGRKT	0.464364	0.267124	0.807244	0.00107443
PITRM1	2.09293	1.28725	3.40289	0.00227691
PINK1	1.3038	0.806171	2.10861	0.274588
PICK1	0.743975	0.432925	1.27851	0.252002
PHYH	1.71972	1.02348	2.88959	0.0245752
PHB2	1.27867	0.754439	2.16716	0.33617
PHB	1.33632	0.824459	2.16598	0.23165
PGS1	1.28322	0.782093	2.10544	0.307356
PEX11B	0.589164	0.343987	1.00909	0.031617
PDSS2	1.58288	0.963336	2.60088	0.0904996
PDSS1	1.26049	0.744887	2.133	0.36505
PDPR	1.39583	0.864668	2.25327	0.172973
PDP1	0.726746	0.434728	1.21492	0.252263
PDK4	0.752061	0.462191	1.22373	0.262108
PDK3	0.671566	0.38901	1.15936	0.116294
PDK2	0.784763	0.482759	1.27569	0.338238
PDK1	0.756997	0.443037	1.29345	0.335391
PDHX	0.805709	0.495089	1.31121	0.39394
PDHB	0.803536	0.496095	1.3015	0.369607
PDHA2	1.56049	0.913397	2.66602	0.0701246
PDHA1	0.740619	0.458763	1.19564	0.220348
PDE2A	1.43316	0.885448	2.31968	0.136823
PDE12	0.619288	0.379001	1.01192	0.0460667
PCK2	1.32403	0.804083	2.1802	0.288763
PCCB	2.10002	1.30022	3.39181	0.00295999
PCCA	0.709325	0.438933	1.14628	0.155798
PC	0.703396	0.432283	1.14454	0.168263
PARL	0.751798	0.441597	1.2799	0.261858
PARK7	0.724319	0.435005	1.20605	0.192304
PANK2	0.5946	0.341825	1.0343	0.0371301
PAM16	1.43437	0.861248	2.38887	0.191998
PAICS	1.61425	0.998251	2.61038	0.0592012
OXSM	2.49057	1.38806	4.46878	0.000104764
OXR1	1.3254	0.783469	2.24218	0.321795
OXLD1	0.868417	0.530783	1.42082	0.56336
OXCT2	0.780866	0.466817	1.30619	0.322924
OXCT1	0.585945	0.352851	0.973023	0.0259616
OXA1L	1.66879	0.968665	2.87494	0.038736
OTC	1.49196	0.924217	2.40846	0.0999614
OSGEPL1	0.766502	0.459523	1.27855	0.331699
OSBPL1A	1.28901	0.774562	2.14515	0.307975
OPA3	1.27248	0.770564	2.10132	0.361021
OPA1	1.29496	0.780825	2.14761	0.330131
OGG1	0.660062	0.401097	1.08622	0.0853772
OGDHL	1.9865	1.21925	3.23659	0.0110489
OGDH	1.6685	0.983305	2.83117	0.0363928
OAT	0.760469	0.47065	1.22875	0.259907
NUDT9	1.38302	0.838179	2.28201	0.226151
NUDT6	1.87884	1.10776	3.18664	0.00818687
NUDT2	1.3221	0.817235	2.13885	0.25043
NUDT13	1.40547	0.863312	2.2881	0.180633
NUBPL	2.23546	1.34264	3.72198	0.000654646
NTHL1	1.3087	0.810511	2.11312	0.273617
NT5M	1.58583	0.98237	2.56	0.0616342
NT5DC3	1.54733	0.924872	2.58871	0.072547
NT5DC2	0.729066	0.44237	1.20157	0.194951
NSUN3	1.28686	0.796221	2.07983	0.307389
NRDC	1.29072	0.766143	2.17448	0.314055
NOCT	1.32969	0.796806	2.21895	0.246802
NNT	0.591614	0.348148	1.00534	0.0323041
NME6	1.85521	1.12245	3.06633	0.0308396
NME4	1.54747	0.899525	2.66213	0.0832094
NME3	1.90364	1.16941	3.09887	0.00759993
NLRX1	0.766343	0.443711	1.32357	0.305129
NIT2	1.87062	1.14904	3.04535	0.0192928
NIT1	2.25464	1.39226	3.65119	0.000925879
NIPSNAP3B	1.23469	0.741496	2.05593	0.431837
NIPSNAP2	1.4805	0.858236	2.55393	0.12163
NIPSNAP1	2.16261	1.33773	3.49614	0.00295481
NIF3L1	1.36901	0.834162	2.24679	0.195739
NGRN	1.45128	0.896635	2.34903	0.14032
NFU1	1.25915	0.757468	2.09312	0.392183
NFS1	1.45616	0.879589	2.41067	0.123159
NDUFV2	1.32612	0.803038	2.18993	0.250819
NDUFV1	1.41675	0.848902	2.36445	0.157956
NDUFS7	1.35502	0.837071	2.19347	0.223696
NDUFS6	0.536588	0.326682	0.881366	0.024982
NDUFS4	1.47707	0.902422	2.41765	0.107354
NDUFS3	0.842211	0.520193	1.36357	0.488616
NDUFS2	1.39528	0.861266	2.26041	0.169154
NDUFS1	1.65103	1.02099	2.66986	0.0397701
NDUFC1	1.42361	0.88079	2.30095	0.147025
NDUFB8	1.5183	0.909123	2.53568	0.0883655
NDUFB7	1.91361	1.18511	3.08993	0.0092091
NDUFB6	1.37201	0.82866	2.27164	0.196965
NDUFB5	1.56974	0.949534	2.59503	0.10381
NDUFB4	1.46559	0.904032	2.37598	0.133679
NDUFB3	0.753795	0.452578	1.25549	0.301533
NDUFB2	0.666008	0.411799	1.07714	0.10524
NDUFB11	0.671222	0.385267	1.16942	0.116516
NDUFB1	1.25688	0.760646	2.07684	0.355649
NDUFAF7	1.28969	0.796513	2.08824	0.294282
NDUFAF5	1.56606	0.908938	2.69824	0.0742978
NDUFAF4	1.50187	0.915335	2.46425	0.129387
NDUFAF3	1.35292	0.837677	2.18509	0.222054
NDUFAF1	1.90823	1.16023	3.13846	0.00697544
NDUFAB1	1.61722	1.00012	2.61508	0.0580851
NDUFA9	0.711464	0.440379	1.14942	0.170161
NDUFA8	0.712149	0.440304	1.15183	0.166005
NDUFA7	0.625852	0.365277	1.07231	0.0580393
NDUFA6	2.06534	1.25139	3.40873	0.0131447
NDUFA5	0.751475	0.460373	1.22665	0.268796
NDUFA4	1.46722	0.882699	2.43881	0.165983
NDUFA3	0.608914	0.361843	1.02469	0.0394363
NDUFA2	1.19583	0.739748	1.93311	0.464415
NDUFA13	0.781071	0.477816	1.27679	0.302616
NDUFA10	1.83481	1.1224	2.99941	0.0112622
NDUFA1	1.31881	0.816959	2.12895	0.258111
NBR1	0.698923	0.431832	1.13121	0.140058
NAXD	0.699408	0.413488	1.18304	0.153598
NARS2	2.17736	1.23954	3.82473	0.00120993
MYO19	1.59023	0.979053	2.58293	0.0699784
MUTYH	1.65134	0.996575	2.73631	0.0751976
MUL1	0.562265	0.342108	0.9241	0.0156835
MTX2	1.75357	1.05621	2.91138	0.0509658
MTX1	1.50365	0.923504	2.44825	0.0904392
MTRF1L	0.717369	0.422277	1.21867	0.188452
MTRF1	0.489078	0.291291	0.821162	0.00242361
MTPAP	1.5164	0.868202	2.64853	0.10549
MTO1	2.07022	1.25456	3.41618	0.0124264
MTIF2	1.54681	0.934605	2.56005	0.115338
MTHFD2L	0.785587	0.486409	1.26878	0.327253
MTHFD2	1.48573	0.91207	2.42021	0.127989
MTG1	0.57092	0.351064	0.928462	0.0201137
MTFR1	1.53855	0.929759	2.54596	0.0762769
MTERF4	1.3921	0.819583	2.36456	0.186352
MTERF3	1.30854	0.778963	2.19814	0.334088
MTERF1	0.712567	0.440971	1.15144	0.16429
MTCH2	2.0104	1.14741	3.52244	0.00423234
MTCH1	1.54383	0.951821	2.50404	0.0898584
MSRB2	1.28079	0.766554	2.14001	0.363924
MSRA	0.854942	0.517175	1.41331	0.548655
MRS2	1.76119	1.08529	2.85802	0.0178678
MRPS7	1.33378	0.825686	2.15453	0.24445
MRPS35	1.34376	0.816895	2.21044	0.263439
MRPS34	1.63208	0.999485	2.66504	0.0669447
MRPS33	1.33556	0.804375	2.21753	0.242286
MRPS31	0.763314	0.457783	1.27276	0.322141
MRPS30	0.744839	0.461366	1.20248	0.229124
MRPS28	1.52396	0.912197	2.54599	0.0856951
MRPS27	1.30412	0.781799	2.17539	0.332756
MRPS22	1.37648	0.852558	2.22235	0.191851
MRPS2	1.35188	0.812995	2.24795	0.269043
MRPS18C	1.55531	0.929194	2.60333	0.0715156
MRPS18B	1.57852	0.974277	2.5575	0.057943
MRPS18A	0.788841	0.488629	1.2735	0.333222
MRPS17	1.40576	0.855082	2.31109	0.162744
MRPS16	1.58636	0.965593	2.60623	0.0903177
MRPS15	1.7406	1.07305	2.82345	0.0216081
MRPS14	1.23294	0.757881	2.00577	0.390305
MRPS12	0.67619	0.411707	1.11058	0.144246
MRPS11	1.51139	0.905209	2.52349	0.145251
MRPS10	0.654714	0.389486	1.10055	0.0845243
MRPL9	0.771875	0.465439	1.28006	0.334507
MRPL58	1.6665	1.0214	2.71903	0.0342349
MRPL57	1.62197	0.998048	2.63592	0.0450083
MRPL52	1.82728	1.09617	3.04602	0.0404237
MRPL49	1.37733	0.791664	2.39627	0.217147
MRPL48	1.84412	1.1275	3.01621	0.0247644
MRPL46	1.57941	0.915677	2.72424	0.0695465
MRPL44	1.59345	0.987085	2.57231	0.0557954
MRPL42	1.28729	0.764317	2.16811	0.316611
MRPL41	0.813994	0.503835	1.31509	0.397105
MRPL40	2.00681	1.23229	3.26812	0.0110911
MRPL4	1.52416	0.941249	2.46806	0.0961706
MRPL39	1.49911	0.925027	2.42947	0.0951551
MRPL35	1.42865	0.875344	2.33172	0.17126
MRPL34	1.26372	0.760653	2.09951	0.347982
MRPL33	1.42083	0.86276	2.33988	0.186638
MRPL3	1.45493	0.892452	2.37191	0.121971
MRPL28	1.67482	1.01786	2.7558	0.0606885
MRPL24	1.84666	1.14195	2.98625	0.0171679
MRPL23	1.55478	0.961447	2.51426	0.07048
MRPL22	0.853897	0.52616	1.38578	0.52475
MRPL20	1.61295	0.99659	2.61052	0.0493717
MRPL2	1.68032	1.03992	2.7151	0.0320661
MRPL19	0.868199	0.535782	1.40686	0.565328
MRPL18	1.57961	0.972976	2.56446	0.0584925
MRPL17	1.2213	0.753601	1.97927	0.413783
MRPL16	1.5803	0.978012	2.5535	0.0613074
MRPL15	1.57473	0.952785	2.60265	0.100535
MRPL13	0.832765	0.509537	1.36103	0.455758
MRPL12	1.27296	0.761429	2.12813	0.376546
MRPL11	1.33039	0.821448	2.15465	0.255305
MRM3	1.62532	1.00003	2.64159	0.0435919
MRM2	1.58302	0.958184	2.61532	0.0926669
MRM1	1.59456	0.950354	2.67545	0.053848
MPV17	0.63235	0.37484	1.06676	0.0626284
MPST	1.75763	1.07416	2.87598	0.019129
MPC2	1.40329	0.86914	2.26572	0.170489
MPC1	0.834242	0.501695	1.38722	0.471323
MOCS1	1.40072	0.867698	2.26117	0.166629
MMADHC	1.73251	1.03032	2.91326	0.0231488
MLYCD	1.26292	0.780397	2.04379	0.336932
MIPEP	0.847568	0.520624	1.37983	0.497645
MIEF1	1.23168	0.728627	2.08204	0.453512
MICU2	1.42899	0.824927	2.47539	0.164348
MICU1	1.34388	0.794294	2.27374	0.243031
MGST3	1.66434	0.949305	2.91796	0.0441172
MFN2	1.44114	0.823026	2.52348	0.156636
MFN1	1.49584	0.915324	2.44452	0.124892
MFF	1.24367	0.736487	2.10014	0.434658
METTL8	0.531437	0.311074	0.907904	0.00761229
METTL5	1.54216	0.927149	2.56514	0.0756023
METTL4	1.47664	0.912686	2.38908	0.120255
METTL17	0.602534	0.343815	1.05594	0.0438951
MECR	1.21608	0.737744	2.00455	0.429877
ME3	1.53474	0.943524	2.4964	0.0997375
ME2	1.40671	0.871149	2.27153	0.162722
MDH2	1.83878	1.12405	3.00797	0.0265428
MCUR1	1.18648	0.734108	1.91761	0.481176
MCUB	0.633166	0.381831	1.04994	0.0575194
MCL1	0.633037	0.375291	1.0678	0.0631354
MCCC2	0.730247	0.430717	1.23808	0.214358
MCCC1	1.36834	0.846275	2.21246	0.194251
MCAT	1.92197	1.18938	3.1058	0.0112905
MAVS	1.48215	0.892445	2.46153	0.155985
MAOB	1.36083	0.797194	2.32296	0.226869
MAOA	0.588077	0.364171	0.949651	0.0312229
MAIP1	1.27004	0.774558	2.08247	0.328619
MACROD1	1.98088	1.19583	3.28131	0.00377919
LYRM9	0.688239	0.408912	1.15838	0.131354
LYRM4	1.24937	0.748607	2.08511	0.375801
LYRM2	1.43439	0.8885	2.31566	0.144237
LYRM1	1.53423	0.945997	2.48824	0.0772001
LYPLA1	1.59849	0.984167	2.59628	0.0513258
LRPPRC	1.96659	1.20644	3.20569	0.0128686
LONP1	1.92665	1.19232	3.11324	0.0107168
LIPT1	1.65242	0.98132	2.78247	0.0388104
LIG3	1.82281	1.10812	2.99845	0.0310939
LIAS	1.48919	0.911033	2.43425	0.131825
LETMD1	1.45638	0.865089	2.45181	0.1289
LETM1	1.70665	1.05514	2.76045	0.0366095
LDHB	1.2594	0.780085	2.03323	0.345766
LDHAL6B	1.37739	0.853241	2.22352	0.192628
LARS2	1.62821	0.974139	2.72145	0.0444651
LAP3	0.55971	0.341577	0.917146	0.0351333
LACTB2	1.40085	0.860344	2.28091	0.188631
L2HGDH	1.70567	1.03788	2.80312	0.0528673
KYAT3	0.608362	0.370615	0.998622	0.0390972
KMO	1.4175	0.876576	2.29221	0.161735
IVD	1.47508	0.912013	2.38578	0.109402
ISOC2	1.5707	0.925457	2.66582	0.0685791
ISCU	0.63927	0.384052	1.06409	0.11448
ISCA1	1.67002	1.03452	2.6959	0.0388742
IMMT	0.702746	0.433946	1.13805	0.15541
IFI27	1.53076	0.94393	2.48243	0.0775401
IDI1	1.41268	0.874991	2.28079	0.160429
IDH3G	1.56803	0.946151	2.59864	0.0626519
IDH3B	1.5658	0.90089	2.72147	0.0751458
IDH3A	1.7117	1.05955	2.76522	0.0338694
IDH2	1.28359	0.744794	2.21215	0.337225
IDE	0.771687	0.472084	1.26143	0.316442
IBA57	0.722446	0.446047	1.17012	0.179661
IARS2	1.38978	0.850277	2.27161	0.207808
HTRA2	1.23335	0.761397	1.99785	0.387677
HTATIP2	2.07135	1.28312	3.34379	0.00409035
HSPE1	0.643514	0.38896	1.06466	0.10955
HSPD1	0.605819	0.369675	0.992807	0.065193
HSPA9	2.1259	1.30401	3.4658	0.00671371
HSDL2	0.620665	0.383803	1.0037	0.0592088
HSD17B8	1.39162	0.861876	2.24697	0.176237
HSD17B4	0.578916	0.349963	0.957655	0.0227039
HSD17B10	0.706216	0.404339	1.23347	0.17625
HMGCS2	0.750466	0.455958	1.2352	0.278376
HMGCL	1.33782	0.828714	2.15968	0.231747
HINT1	1.88299	1.13018	3.13724	0.00816104
HIGD2A	1.44244	0.889452	2.33923	0.128853
HIGD1A	0.722704	0.447566	1.16698	0.188758
HIBCH	0.590756	0.363599	0.95983	0.0449635
HEMK1	1.42275	0.860952	2.35114	0.148981
HEBP1	0.777352	0.480785	1.25685	0.295913
HDHD5	1.28836	0.797165	2.08222	0.306209
HDHD3	0.700195	0.428592	1.14392	0.139731
HCCS	0.649036	0.400134	1.05277	0.0715311
HARS2	1.61382	0.954566	2.72837	0.0505981
HAO2	1.38558	0.816174	2.35223	0.190653
HAGH	0.64633	0.392752	1.06363	0.108773
HADHB	0.649189	0.383331	1.09943	0.0800384
HADHA	1.231	0.759764	1.99451	0.400114
HADH	0.612784	0.37174	1.01013	0.0765512
GUK1	0.816945	0.500939	1.3323	0.40801
GUF1	1.5088	0.934297	2.43658	0.0927416
GTPBP6	0.652581	0.397814	1.0705	0.0754448
GTPBP3	1.52535	0.942006	2.46994	0.0960836
GSTZ1	1.93893	1.12191	3.35095	0.00642631
GSTK1	1.25165	0.769391	2.03619	0.37487
GSR	1.77089	1.0744	2.9189	0.0427082
GRSF1	0.652369	0.390278	1.09047	0.0810895
GRPEL1	1.80826	1.099	2.97525	0.0134266
GRHPR	1.96167	1.20328	3.19806	0.0141112
GPX4	0.760667	0.468507	1.23502	0.278264
GPX1	0.732705	0.449446	1.19449	0.224795
GPD2	1.78845	1.03733	3.08346	0.0173597
GOT2	1.50162	0.889116	2.53606	0.100685
GOLPH3	0.751481	0.456532	1.23699	0.280098
GLYAT	1.71907	1.05547	2.79989	0.036376
GLUD2	1.80218	1.11606	2.9101	0.0170308
GLUD1	1.76597	1.08862	2.86478	0.0279237
GLS2	1.58722	0.974183	2.58605	0.0790261
GLS	0.750379	0.457979	1.22946	0.269162
GLRX5	0.693525	0.4034	1.19231	0.14839
GLRX2	2.05128	1.24615	3.37659	0.00263859
GLOD4	1.55009	0.955438	2.51483	0.0680278
GLDC	0.660143	0.395361	1.10226	0.0902111
GHITM	0.686337	0.404923	1.16333	0.132826
GFM1	1.22359	0.734243	2.03907	0.453703
GFER	1.82307	1.12498	2.95436	0.0212319
GDAP1	0.670135	0.405912	1.10635	0.0993335
GCSH	1.51947	0.940835	2.45398	0.0872703
GCDH	0.747028	0.462016	1.20786	0.238084
GCAT	1.28708	0.769077	2.15397	0.314876
GATM	1.59779	0.989	2.58132	0.0614599
GATD3A	1.40597	0.847499	2.33244	0.164466
GATC	0.785161	0.478763	1.28765	0.322721
GATB	1.4481	0.895868	2.34075	0.137269
GADD45GIP1	1.25808	0.778855	2.03216	0.348615
FXN	1.37473	0.851314	2.21995	0.197642
FTH1	1.44876	0.871101	2.40949	0.130809
FPGS	1.24988	0.760054	2.05538	0.364958
FLAD1	0.635271	0.389753	1.03545	0.084549
FKBP8	0.633034	0.38521	1.04029	0.0917506
FKBP10	0.695026	0.428609	1.12704	0.133123
FIS1	1.36606	0.822252	2.26952	0.254194
FHIT	1.92639	1.19296	3.11073	0.00826599
FH	0.759972	0.467047	1.23662	0.255306
FECH	1.32713	0.812923	2.1666	0.244287
FDXR	1.89124	1.14578	3.12172	0.00786432
FDX1	1.5662	0.966073	2.53913	0.0806294
FDPS	1.86528	1.14116	3.04887	0.0223831
FBXL4	1.43566	0.868162	2.3741	0.137307
FASTKD5	0.730643	0.444713	1.20041	0.233597
FASTKD3	0.637632	0.38956	1.04368	0.0624968
FASTKD2	0.791297	0.485146	1.29064	0.360546
FASTKD1	1.62024	1.00098	2.62261	0.0458689
FASTK	0.79126	0.48659	1.2867	0.353399
FASN	0.745161	0.446157	1.24455	0.236371
FARS2	1.30106	0.805824	2.10064	0.280179
FAM162A	0.620783	0.383242	1.00556	0.0623429
FAHD2A	1.56102	0.920391	2.64757	0.0722995
FABP1	1.96182	1.19818	3.21214	0.0157635
EXOG	1.93872	1.19832	3.13661	0.0110878
EXD2	0.7609	0.456443	1.26844	0.26739
ETHE1	1.47645	0.869782	2.50626	0.119073
ETFDH	0.735604	0.45259	1.19559	0.205507
ETFB	1.36581	0.845031	2.20755	0.210245
ETFA	1.71845	1.03424	2.85532	0.0237837
ERAL1	1.69184	1.04177	2.74753	0.0288566
EPHX2	0.659433	0.391888	1.10963	0.150669
ENDOG	1.55636	0.946127	2.56019	0.104774
ELAC2	0.595571	0.345431	1.02685	0.0349935
EHHADH	0.504502	0.309613	0.822064	0.0125152
EFHD1	1.28144	0.774359	2.12058	0.312467
ECSIT	1.3658	0.837816	2.2265	0.22245
ECI2	1.73598	1.01073	2.98163	0.0246011
ECI1	1.80961	1.11831	2.92826	0.0153225
ECHS1	1.23725	0.758253	2.01882	0.382111
ECHDC3	0.758249	0.465826	1.23424	0.279296
ECHDC2	0.798445	0.492687	1.29395	0.352031
ECHDC1	0.729183	0.423231	1.25631	0.217336
ECH1	1.7533	1.07355	2.86345	0.0382014
DUT	1.67048	1.01504	2.74915	0.0631905
DUS2	1.91357	1.12591	3.25225	0.00684184
DTYMK	2.58095	1.57718	4.22353	0.00126917
DNM1L	1.35634	0.84015	2.18969	0.213258
DNAJC4	0.777303	0.475383	1.27098	0.301149
DNAJC28	0.784858	0.478566	1.28718	0.322285
DNAJC15	1.38172	0.851521	2.24205	0.182104
DNAJC11	1.78725	1.10481	2.89124	0.0164592
DNAJA3	1.60894	0.991011	2.61217	0.0672314
DNA2	0.805201	0.497754	1.30255	0.37156
DMPK	1.26953	0.786386	2.04952	0.32478
DMAC2	1.57449	0.975102	2.54233	0.0688031
DLD	1.79455	1.09546	2.93978	0.0337162
DLAT	1.69198	1.0288	2.78265	0.0278108
DIABLO	1.59829	0.975379	2.61903	0.0472551
DHX30	0.638893	0.373825	1.09191	0.071927
DHTKD1	1.40551	0.86998	2.27071	0.170581
DHRS7B	0.712443	0.431559	1.17614	0.165611
DHRS2	1.57237	0.973173	2.54049	0.0628962
DHRS1	2.14024	1.32363	3.46066	0.00368696
DHODH	1.4408	0.830816	2.49862	0.154266
DGUOK	1.46784	0.883105	2.43975	0.165038
DGLUCY	0.73804	0.446607	1.21965	0.257176
DELE1	1.60761	0.97418	2.65289	0.086743
DECR1	0.623419	0.366441	1.06061	0.0563273
DDX28	1.92676	1.15164	3.2236	0.0301332
DCXR	1.42023	0.852014	2.3674	0.206511
DCAKD	0.741543	0.452905	1.21413	0.252937
DBT	1.23501	0.764387	1.9954	0.389695
DBI	1.22585	0.75924	1.97922	0.403678
DARS2	1.52028	0.910201	2.53929	0.0876605
DAP3	1.64998	1.0172	2.6764	0.0530808
CYP27B1	0.692712	0.428871	1.11887	0.13284
CYP27A1	0.593609	0.362412	0.972296	0.0302476
CYP24A1	1.27192	0.786815	2.05611	0.331442
CYP11B2	0.500825	0.304608	0.823438	0.0155424
CYP11B1	1.82932	1.0949	3.05637	0.011174
CYP11A1	0.629183	0.389757	1.01569	0.0615071
CYCS	1.37646	0.852551	2.22234	0.190359
CYC1	2.54324	1.54284	4.19231	0.00227291
CYB5R3	0.823301	0.509672	1.32992	0.419146
CYB5B	0.740453	0.447956	1.22394	0.264252
CS	1.21632	0.710556	2.08209	0.453106
CRYZ	1.3204	0.801722	2.17464	0.290427
CRY1	0.776376	0.480885	1.25344	0.297213
CROT	0.697381	0.431983	1.12583	0.142352
CRAT	1.47962	0.877455	2.49502	0.114025
CPT2	1.47585	0.894673	2.43456	0.108221
CPT1A	1.26469	0.782445	2.04416	0.333511
CPS1	0.72492	0.445746	1.17894	0.184434
CPOX	1.55408	0.952979	2.53432	0.067805
COX8A	1.35047	0.797764	2.28611	0.233932
COX7C	1.35954	0.802531	2.30315	0.222393
COX7B	1.76988	1.09046	2.87263	0.0180368
COX7A2L	1.27222	0.755182	2.14324	0.387839
COX7A2	1.4527	0.899881	2.34514	0.128727
COX7A1	0.509397	0.286141	0.906845	0.00578865
COX6C	0.734174	0.444444	1.21278	0.250347
COX6B1	1.31696	0.784479	2.21088	0.322327
COX6A2	0.722584	0.422447	1.23596	0.203029
COX6A1	1.185	0.733625	1.91409	0.489225
COX5B	1.37959	0.835947	2.27676	0.23057
COX5A	1.86748	1.15508	3.01925	0.0155562
COX4I1	1.47748	0.899324	2.42732	0.106593
COX15	0.742781	0.458941	1.20217	0.219869
COX11	0.681088	0.419138	1.10675	0.135106
COX10	1.74181	1.07577	2.82022	0.0214048
COQ9	1.78331	1.08031	2.94376	0.0159641
COQ8B	0.491636	0.303696	0.795881	0.00611384
COQ8A	1.29557	0.79203	2.11923	0.288422
COQ7	1.57683	0.975893	2.5478	0.0625637
COQ6	1.71971	1.06482	2.77735	0.0256741
COQ4	0.680443	0.391304	1.18323	0.125936
COQ3	1.5961	0.971905	2.62117	0.0852498
COQ2	1.54737	0.930011	2.57455	0.0726633
COQ10B	0.639349	0.396054	1.0321	0.0708737
COMT	1.2061	0.716082	2.03145	0.464459
COASY	1.31448	0.782855	2.20713	0.32689
COA7	0.788616	0.487814	1.2749	0.337882
COA4	1.47272	0.846675	2.56168	0.132857
COA3	1.45082	0.872232	2.4132	0.129836
COA1	2.20311	1.348	3.60067	0.00542543
CMC4	0.720576	0.444859	1.16718	0.174307
CMC2	1.38711	0.840965	2.28793	0.177042
CLPX	1.70277	1.05444	2.74974	0.0295328
CLPP	0.786425	0.477665	1.29477	0.32419
CLPB	1.35403	0.787191	2.32905	0.240541
CKMT2	1.60437	0.972076	2.64795	0.0858317
CISD1	1.71937	1.02926	2.8722	0.0250258
CHPT1	0.719794	0.444925	1.16447	0.189244
CHCHD7	0.798815	0.485709	1.31376	0.360419
CHCHD3	2.05432	1.2154	3.47228	0.00251398
CHCHD2	1.44243	0.892226	2.33192	0.131908
CDK5RAP1	1.36819	0.832744	2.24793	0.23627
CCDC90B	2.7437	1.55064	4.85469	1.63558e-05
CCDC51	1.35737	0.840461	2.19219	0.216553
CBR4	1.39351	0.826098	2.35064	0.173509
CBR3	1.52418	0.906258	2.56343	0.146128
CAT	0.745049	0.460816	1.2046	0.235788
CASP9	1.46361	0.905626	2.36538	0.121084
CASP8	0.530851	0.327052	0.861645	0.00892008
CASP3	0.678441	0.408318	1.12726	0.163301
CARS2	0.762597	0.448675	1.29616	0.281096
CA5B	1.14353	0.701455	1.86422	0.581173
CA5A	0.72921	0.440441	1.20731	0.198673
C1QBP	0.747577	0.442073	1.26421	0.249254
BPHL	2.00928	1.24031	3.25499	0.00408048
BOLA1	1.18258	0.729667	1.91662	0.490765
BNIP3L	1.80713	1.09366	2.98605	0.0125775
BNIP3	1.7632	1.09181	2.84745	0.0237475
BLOC1S1	0.65361	0.386228	1.1061	0.0841793
BIK	1.57455	0.971903	2.55089	0.0552817
BID	0.547293	0.323672	0.925412	0.0124113
BDH1	1.47863	0.900274	2.42854	0.142031
BCS1L	2.12108	1.28762	3.49401	0.0100383
BCL2L2	1.48989	0.882903	2.51416	0.106825
BCL2L13	1.72015	1.05216	2.81222	0.0457098
BCL2L11	0.658149	0.405068	1.06935	0.0832088
BCL2L10	0.829932	0.503814	1.36714	0.451538
BCL2L1	1.31122	0.751435	2.28803	0.29533
BCL2A1	0.757206	0.468067	1.22495	0.252103
BCL2	0.667134	0.392337	1.1344	0.104174
BCKDK	1.32183	0.78113	2.2368	0.325925
BCKDHB	1.30308	0.801156	2.11946	0.269805
BCKDHA	0.734479	0.439172	1.22836	0.215047
BCAT2	1.33054	0.792497	2.23388	0.255142
BAX	0.691776	0.423159	1.13091	0.12607
BAK1	0.754782	0.463717	1.22854	0.246122
BAD	0.518793	0.292269	0.920884	0.0078789
AURKAIP1	1.53135	0.939716	2.49547	0.0770474
AUH	1.62099	0.944399	2.78231	0.0519181
ATPAF2	0.641654	0.380934	1.08082	0.0709234
ATP5PO	1.33554	0.808314	2.20667	0.23914
ATP5PF	1.65258	0.981407	2.78278	0.0396356
ATP5PD	2.40926	1.46602	3.95938	0.00310066
ATP5PB	1.36988	0.824747	2.27534	0.247641
ATP5MPL	1.21141	0.723606	2.02807	0.448699
ATP5MG	1.62056	0.998429	2.63034	0.0629801
ATP5ME	0.80088	0.481438	1.33228	0.409792
ATP5MC3	1.41048	0.870754	2.28475	0.172052
ATP5MC2	1.33548	0.796597	2.23891	0.295598
ATP5MC1	1.2673	0.762782	2.1055	0.379011
ATP5IF1	0.50176	0.295889	0.850868	0.00403506
ATP5F1E	1.26795	0.758154	2.12053	0.385947
ATP5F1D	1.22116	0.732659	2.03539	0.457163
ATP5F1C	1.7855	1.05855	3.01168	0.0162705
ATP5F1B	1.32491	0.80035	2.19327	0.295014
ATP5F1A	1.26339	0.776914	2.05446	0.355999
ARMCX6	1.40022	0.867163	2.26096	0.167447
ARMCX3	1.32212	0.804244	2.17346	0.253602
ARMCX2	1.20883	0.748539	1.95216	0.438856
ARMCX1	0.554284	0.338462	0.907727	0.0301026
ARL2	1.87471	1.15166	3.05171	0.0193938
ARG2	1.2596	0.775489	2.04592	0.342203
ARF5	1.83219	1.08325	3.09895	0.011737
APOOL	2.01158	1.19278	3.39247	0.00262678
APOO	0.783836	0.485304	1.26601	0.315103
APEX1	2.23983	1.28133	3.91533	0.000791969
ANGEL2	0.523867	0.30832	0.890103	0.0071057
AMT	0.683059	0.421774	1.10621	0.116464
AMACR	0.570267	0.345735	0.940618	0.0460788
ALKBH1	0.716744	0.427571	1.20149	0.180297
ALDH9A1	1.66901	1.01912	2.73334	0.0589039
ALDH7A1	1.78436	0.996278	3.19584	0.0220818
ALDH6A1	1.84205	1.13069	3.00097	0.0236148
ALDH5A1	0.664084	0.39309	1.1219	0.0985233
ALDH4A1	0.684833	0.40095	1.16971	0.131809
ALDH3A2	1.45525	0.864488	2.44972	0.130359
ALDH2	0.617769	0.365288	1.04476	0.0490674
ALDH1L1	1.7367	1.03694	2.90866	0.0618469
ALDH1B1	0.64367	0.390448	1.06112	0.0654734
ALDH18A1	0.786887	0.487424	1.27033	0.325763
ALAS2	1.17719	0.728454	1.90235	0.497907
ALAS1	0.66895	0.412884	1.08382	0.112546
AKR7A2	1.57963	0.934104	2.67126	0.123308
AKR1B10	0.697516	0.412249	1.18018	0.148065
AKAP10	1.46583	0.887277	2.42162	0.1605
AKAP1	1.29586	0.776401	2.16286	0.342175
AK4	1.64366	1.01317	2.6665	0.0550434
AK2	1.81662	1.12515	2.93301	0.0180946
AIFM1	1.52858	0.938096	2.49074	0.0769409
AHCYL1	0.797689	0.493592	1.28914	0.351079
AGXT	1.9539	1.19828	3.18602	0.0135488
AGPAT5	1.79844	1.06541	3.03581	0.014567
AGPAT4	0.63337	0.388642	1.0322	0.0831324
AGMAT	1.3946	0.859175	2.26371	0.169783
AGK	1.22189	0.755601	1.97592	0.409835
AFG3L2	1.70362	1.05449	2.75235	0.0353576
ADCY10	0.823714	0.501857	1.35199	0.426178
ADCK2	1.33921	0.81712	2.19488	0.231033
ACSS3	1.36788	0.839158	2.22973	0.21451
ACSM5	1.2575	0.731577	2.16151	0.378977
ACSM3	0.712159	0.441157	1.14964	0.166048
ACSM1	2.12329	1.21322	3.71604	0.00169892
ACSL6	1.27986	0.755063	2.16939	0.331591
ACSL1	0.704119	0.436132	1.13677	0.153069
ACSF2	0.693682	0.425693	1.13038	0.130194
ACP6	1.57587	0.953529	2.6044	0.100536
ACOT9	1.25025	0.739484	2.11379	0.383399
ACOT7	2.0689	1.26731	3.37752	0.00861431
ACOT13	1.55534	0.96347	2.51079	0.0727302
ACOT11	2.11995	1.21159	3.70934	0.00172162
ACO2	0.847332	0.518933	1.38355	0.499355
ACLY	1.3746	0.827826	2.28252	0.240551
ACAT1	1.95934	1.202	3.19384	0.00508088
ACADVL	1.24021	0.766686	2.00618	0.37402
ACADSB	0.622377	0.380993	1.01669	0.0495333
ACADS	0.747054	0.451642	1.23569	0.279353
ACADM	0.680268	0.400946	1.15418	0.122383
ACADL	0.797888	0.471803	1.34935	0.374611
ACAD8	1.4143	0.870852	2.29687	0.142701
ACAD10	0.751664	0.460482	1.22697	0.269675
ACACB	0.776894	0.479834	1.25786	0.298418
ACACA	1.48397	0.899086	2.44936	0.145081
ACAA2	0.648278	0.395027	1.06389	0.071211
ACAA1	1.42398	0.860025	2.35775	0.192407
ABHD11	1.29335	0.779779	2.14517	0.339002
ABHD10	0.776208	0.472747	1.27446	0.333336
ABCD3	1.27666	0.747615	2.18009	0.342294
ABCD2	1.33469	0.811005	2.19654	0.270435
ABCD1	0.860365	0.531924	1.39161	0.542114
ABCB8	0.639806	0.39088	1.04726	0.0948894
ABCB7	1.38581	0.836325	2.2963	0.180204
ABCB6	1.46454	0.869439	2.46698	0.124597
ABAT	0.749849	0.457675	1.22854	0.267078
AASS	0.440033	0.251201	0.770815	0.000602028
